# Supplementary material for: Development of a Weighted-Incidence Syndromic Combination Antibiogram (WISCA) to Guide Empiric Antibiotic Treatment for Ventilator-Associated Pneumonia in a Mexican Tertiary Care University Hospital
Source: Research Square preprint supplement (doi:10.21203/rs.3.rs-4714294/v1), 2024-08-20
Supplement: Supplementary file 1 [file da9bcef36fe46c70daa36a21.docx]

### **WISCA Methodology Description**

The weighted incidence syndromic combination antibody (WISCA) tool was implemented using a Bayesian hierarchical logistic regression model to estimate the effectiveness of various antibiotic regimens against pathogens. This hierarchical model included varying intercepts for both pathogens and treatment regimens to ensure stable and reliable coverage estimates, especially for antibiotic regimens with limited sensitivity data. The Hamiltonian Monte Carlo algorithm was used to sample from the posterior distribution of the model parameters via Stan, a probabilistic programming language for Bayesian inference. The model's structure considered fixed effects such as sex and age, as well as random effects for pathogens and regimens.

The model was specified as follows:

logit (*P* (coverage*i* = 1)) = α+ α*pathogen*[*i*] + α*regimen* [*i*] + *β* **X***i*

where:

- *α* represents the overall intercept.
- α*pathogen*[*i*] and α*regimen [i]* ​ are the random effects for pathogens and regimens, respectively.
- *β* is the vector of fixed effects coefficients.
- **X***i* is the design matrix for the fixed effects, including covariates such as age and sex.

The priors imposed on the model parameters were weakly informative for regularizing the estimates:

- *α ∼ N* (0, 2)
- α*pathogen∼ N* (0, 1)
- α*regimen**∼ N* (0, 1)
- *β* *∼ N* (0, 0.5)

The Hamiltonian Monte Carlo algorithm executed four chains, each with 12000 iterations, discarding the first 2000 iterations as warm-up. Convergence was evaluated using trace plots and the R^ diagnostic to ensure reliable parameter estimates. The posterior distributions of the parameters were summarized using the median and 95% highest density intervals (HDIs), with wider HDIs indicating greater uncertainty in the coverage estimates.

**Tables and Figures**

Table S1. Frequencies of Empiric Antimicrobial Regimens for VAP.

Table S2. R ̂ Index Values of the WISCA Model Parameters.

Table S3. Comparison of VAP-Associated Bacterial Pathogens Regarding the Onset of VAP and Resistance Profiles.

Table S4. WISCA Estimated Coverage for All Evaluated Antibiotic Regimens and the Associated 95% Highest Density Intervals in Patients Who Developed VAP with Less and More than 5 Days of IMV.

Table S5. R ̂ Index Values of the WISCA Model Parameters in Patients with Less and More than 5 Days of IMV Who Develop VAP.

Table S6. Univariate Analysis Regarding In-Hospital Mortality and Extended Hospital Stay.

Figure S1. Monte Carlo Markov Chains (MCMC) Trace Plots of the WISCA Model Parameters.

Figure S2. Density plots of the posterior distributions of the parameters of the model

Figure S3. Distribution of Isolated Microorganisms Over Time of IMV from Patients Who Developed VAP

Table S1. Frequencies of Empiric Antimicrobial Regimens for VAP.

| **Antibiotic regimen** | **Frequency** | **Percentage** |
| --- | --- | --- |
| Meropenem | 49 | 24.87 |
| Colistin+Tigecycline | 36 | 18.27 |
| Piperacillin/Tazobactam | 27 | 13.71 |
| Meropenem+Linezolid | 15 | 7.61 |
| Clindamycin+Ceftriaxone | 9 | 4.57 |
| Ceftriaxone | 8 | 4.06 |
| Colistin+Meropenem | 7 | 3.55 |
| Colistin | 5 | 2.54 |
| Colistin+Meropenem+Tigecycline | 3 | 1.52 |
| Colistin+Linezolid+Tigecycline | 3 | 1.52 |
| Ciprofloxacin+Meropenem | 2 | 1.02 |
| Meropenem+Vancomycin | 2 | 1.02 |
| Ceftriaxone+Metronidazole | 2 | 1.02 |
| Ceftazidime+Piperacillin/Tazobactam | 2 | 1.02 |
| Tigecycline | 2 | 1.02 |
| Cefepime+Linezolid | 2 | 1.02 |
| Ampicillin+Ceftriaxone | 2 | 1.02 |
| Colistin+Levofloxacin+Vancomycin | 2 | 1.02 |
| Amikacin+Linezolid | 1 | 0.51 |
| Linezolid+Piperacillin/Tazobactam | 1 | 0.51 |
| Meropenem+Metronidazole | 1 | 0.51 |
| Colistin+Trimethoprim/Sulfamethoxazole | 1 | 0.51 |
| Metronidazole+Trimethoprim/Sulfamethoxazole+Vancomycin | 1 | 0.51 |
| Piperacillin/Tazobactam+Vancomycin | 1 | 0.51 |
| Daptomycin+Meropenem | 1 | 0.51 |
| Colistin+Linezolid | 1 | 0.51 |
| Colistin+Tigecycline+Vancomycin | 1 | 0.51 |
| Colistin+Linezolid+Meropenem | 1 | 0.51 |
| Amikacin+Meropenem | 1 | 0.51 |
| Colistin+Cefotaxime | 1 | 0.51 |
| Colistin+Cefepime | 1 | 0.51 |
| Clarithromycin+Meropenem | 1 | 0.51 |
| Ceftriaxone+Meropenem+Vancomycin | 1 | 0.51 |
| Ceftazidime+Vancomycin | 1 | 0.51 |
| Ceftazidime+Clindamycin | 1 | 0.51 |
| Ceftazidime | 1 | 0.51 |
| Trimethoprim/Sulfamethoxazole+Piperacillin/Tazobactam | 1 | 0.51 |

Table S2. R ̂ Index Values of the WISCA Model Parameters.

| **Parameter** | **R-hat** |
| --- | --- |
| lp__ | 1.000480 |
| alpha_0 | 1.007100 |
| alpha_pathogen[1] (*Klebsiella pneumoniae ssp pneumoniae*) | 1.003170 |
| alpha_pathogen[2] (*Serratia marcescens*) | 1.002980 |
| alpha_pathogen[3] (*Acinetobacter baumannii*) | 1.003180 |
| alpha_pathogen[4] (*Pseudomonas aeruginosa*) | 1.003350 |
| alpha_pathogen[5] (*Stenotrophomonas maltophilia*) | 1.003180 |
| alpha_pathogen[6] (*Enterobacter cloacae cpmplex*) | 1.003380 |
| alpha_pathogen[7] (*Escherichia coli*) | 1.002900 |
| alpha_pathogen[8] (*Staphylococcus aureus*) | 1.003080 |
| alpha_pathogen[9] (*Providencia stuartii*) | 1.002250 |
| alpha_pathogen[10] (*Proteus mirabilis*) | 1.002780 |
| alpha_pathogen[11] (*Klebsiella oxytoca*) | 1.003220 |
| alpha_pathogen[12] (*Enterobacter aerogenes*) | 1.002170 |
| alpha_pathogen[13] (*Hafnia alvei*) | 1.002870 |
| alpha_pathogen[14] (*Burkholderia gladioli*) | 1.000730 |
| alpha_regimen[1] (TZP) | 1.004080 |
| alpha_regimen[2] (MEM) | 1.004180 |
| alpha_regimen[3] (FEP) | 1.004510 |
| alpha_regimen[4] (CAZ) | 1.004320 |
| alpha_regimen[5] (LNZ) | 1.003770 |
| alpha_regimen[6] (VA) | 1.004460 |
| alpha_regimen[7] (CIP) | 1.004250 |
| alpha_regimen[8] (TGC) | 1.004460 |
| alpha_regimen[9] (TZP+LNZ) | 1.004130 |
| alpha_regimen[10] (MEM+LNZ) | 1.004340 |
| alpha_regimen[11] (FEP+LNZ) | 1.004050 |
| alpha_regimen[12] (CAZ+LNZ) | 1.004250 |
| alpha_regimen[13] (TZP+VA) | 1.004370 |
| alpha_regimen[14] (MEM+VA) | 1.004210 |
| alpha_regimen[15] (FEP+VA) | 1.004140 |
| alpha_regimen[16] (CAZ+VA) | 1.004290 |
| alpha_regimen[17] (CIP+TGC) | 1.004630 |
| alpha_regimen[18] (FEP+TGC) | 1.004470 |
| alpha_regimen[19] (CAZ+TGC) | 1.004320 |
| alpha_regimen[20] (MEM+TGC) | 1.004410 |
| alpha_regimen[21] (TGC+TZP) | 1.004250 |
| beta[1] (Edad) | 0.999831 |
| beta[2] (Sexo) | 1.000290 |

Table S3. Comparison of VAP-Associated Bacterial Pathogens Regarding the Onset of VAP and Resistance Profiles.

| **Organism** | **Total Cases (n=197)** | **VAP development within 5 days of IMV (n=61)** | **VAP development after 5 days of IMV (n=136)** | **P value** |
| --- | --- | --- | --- | --- |
| *Acinetobacter baumannii* | 71 (36.04%) | 8 (13.33%) | 63 (45.99%) | **<0.001** |
| *Pseudomonas aeruginosa* | 36 (18.27%) | 11 (18.33%) | 25 (18.25%) | 1 |
| Enterobacterales | 53 (26.90%) | 24 (38.33%) | 29 (21.17%) | **0.019** |
| *Staphylococcus aureus* | 20 (10.15%) | 13 (21.67%) | 7 (5.11%) | **0.001** |
| *Stenotrophomonas maltophilia* | 16 (8.12%) | 5 (8.33%) | 11 (8.03%) | 1 |
| *Burkholderia gladioli* | 1 (0.51%) | 0 (0.00%) | 1 (0.73%) | 1 |
| **Resistance Pattern** |  |  |  |  |
| XDR *- Acinetobacter baumannii* | 62.0 (87.32) | 7.0 (11.29) | 55.0 (88.70) | **<0.001** |
| MDR *- Acinetobacter baumannii* | 4.0 (5.63) | 1.0 (25) | 3.0 (75) | 1.0 |
| Carbapenem resistant Enterobacteriaceae | 4.0 (7.54) | 0.0 (0) | 4.0 (100) | 0.419 |
| MDR - Enterobacteriaceae | 15.0 (28.3) | 6.0 (40) | 9.0 (60) | 0.619 |
| Methicillin Resistant *Staphylococcus aureus* | 2.0 (1) | 0.0 (0) | 2.0 (100) | 0.854 |
| MDR - *Pseudomonas aeruginosa* | 7.0 (19.44) | 0.0 (0) | 7.0 (100) | 0.165 |
| XDR - *Pseudomonas aeruginosa* | 2.0 (5.55) | 1.0 (50) | 1.0 (50) | 1.0 |
| Bold values are for statistically significant variables. | | | | |

Table S4. WISCA Estimated Coverage for All Evaluated Antibiotic Regimens and the Associated 95% Highest Density Intervals in Patients Who Developed VAP with Less and More than 5 Days of IMV**.**

| **Antibiotic regimen** | **VAP within 5 days of IMV** | | | **VAP after 5 days of IMV** | | |
| --- | --- | --- | --- | --- | --- | --- |
| **Median of the posterior distribution (%)** | **Lower 95% HDI (%)** | **Upper 95% HDI (%)** | **Median of the posterior distribution (%)** | **Lower 95% HDI (%)** | **Upper 95% HDI (%)** |
| Tigecycline + Piperacillin/Tazobactam (TGC+TZP) | 90.64 | 80.34 | 96.37 | 86.05 | 76.57 | 92.42 |
| Meropenem + Tigecycline (MEM+TGC) | 95.07 | 88.99 | 98.36 | 86.32 | 76.82 | 92.58 |
| Cefepime + Tigecycline (FEP+TGC) | 95.06 | 88.96 | 98.42 | 87.35 | 78.41 | 93.31 |
| Cefepime + Vancomycin (FEP+VA) | 81.19 | 66.19 | 91.13 | 41.14 | 26.54 | 57.79 |
| Meropenem + Vancomycin (MEM+VA) | 85.63 | 72.29 | 93.60 | 41.13 | 26.7 | 57.6 |
| Piperacillin/Tazobactam + Vancomycin (TZP+VA) | 76.21 | 59.46 | 88.01 | 32.85 | 20.2 | 48.66 |
| Cefepime + Linezolid (FEP+LNZ) | 81.16 | 66.94 | 91.25 | 41.23 | 26.77 | 57.64 |
| Meropenem + Linezolid (MEM+LNZ) | 85.71 | 73.41 | 93.56 | 41.28 | 26.75 | 57.89 |
| Piperacillin/Tazobactam + Linezolid (TZP+LNZ) | 76.08 | 59.07 | 88.21 | 32.84 | 20.16 | 48.56 |
| Ceftazidime (CAZ) | 52.86 | 33.23 | 70.77 | 26.72 | 15.53 | 41.69 |
| Cefepime (FEP) | 81.30 | 66.86 | 90.83 | 38.92 | 24.95 | 55.48 |
| Meropenem (MEM) | 85.71 | 72.84 | 93.74 | 39 | 24.9 | 55.69 |
| Piperacillin/Tazobactam (TZP) | 76.04 | 58.89 | 88.09 | 32.13 | 19.44 | 48.37 |

Table S5. R ̂ Index Values of the WISCA Model Parameters in Patients with Less and More than 5 Days of IMV Who Develop VAP.

| **VAP within 5 days of IMV** | | **VAP after 5 days of IMV** | |
| --- | --- | --- | --- |
| **Parameter** | **R-hat** | **Parameter** | **R-hat** |
| Log-posterior | 1.00338 | Log-posterior | 1.00057 |
| Global intercept (alpha0) | 1.00066 | Global intercept (alpha0) | 1.00912 |
| alpha_pathogen[1] (*Klebsiella pneumoniae ssp pneumoniae*) | 1.00022 | alpha_pathogen[1] (*Klebsiella pneumoniae ssp pneumoniae*) | 1.00545 |
| alpha_pathogen[2] (*Serratia marcescens*) | 1.00068 | alpha_pathogen[2] (*Serratia marcescens*) | 1.00087 |
| alpha_pathogen[3] (*Acinetobacter baumannii*) | 1.00092 | alpha_pathogen[3] (*Acinetobacter baumannii*) | 1.00488 |
| alpha_pathogen[4] (*Pseudomonas aeruginosa*) | 1.00154 | alpha_pathogen[4] (*Pseudomonas aeruginosa*) | 1.0045 |
| alpha_pathogen[5] (*Stenotrophomonas maltophilia*) | 1.00497 | alpha_pathogen[5] (*Stenotrophomonas maltophilia*) | 1.00456 |
| alpha_pathogen[6] (*Enterobacter cloacae cpmplex*) | 0.999986 | alpha_pathogen[6] (*Enterobacter cloacae cpmplex*) | 1.00557 |
| alpha_pathogen[7] (*Escherichia coli*) | 1.00044 | alpha_pathogen[7] (*Escherichia coli*) | 1.00283 |
| alpha_pathogen[8] (*Staphylococcus aureus*) | 1.00032 | alpha_pathogen[8] (*Staphylococcus aureus*) | 1.00106 |
| alpha_pathogen[9] (*Enterobacter aerogenes*) | 1.00355 | alpha_pathogen[9] (*Providencia stuartii*) | 1.00341 |
| alpha_pathogen[10] (*Hafnia alvei*) | 1.00275 | alpha_pathogen[10] (*Proteus mirabilis*) | 1.00345 |
|  |  | alpha_pathogen[11] (*Klebsiella oxytoca*) | 1.00136 |
|  |  | alpha_pathogen[12] (*Hafnia alvei*) | 1.00234 |
|  |  | alpha_pathogen[13] (*Burkholderia gladioli*) | 1.00422 |
| Tigecycline + Piperacillin/Tazobactam (TGC+TZP) | 0.99912 | Tigecycline + Piperacillin/Tazobactam (TGC+TZP) | 1.00725 |
| Random effect for regimen Meropenem + Tigecycline (MEM+TGC) | 1.00091 | Random effect for regimen Meropenem + Tigecycline (MEM+TGC) | 1.00713 |
| Random effect for regimen Ceftazidime + Tigecycline (CAZ+TGC) | 0.999669 | Random effect for regimen Ceftazidime + Tigecycline (CAZ+TGC) | 1.00806 |
| Random effect for regimen Cefepime + Tigecycline (FEP+TGC) | 1.00025 | Random effect for regimen Cefepime + Tigecycline (FEP+TGC) | 1.0074 |
| Random effect for regimen Ciprofloxacin + Tigecycline (CIP+TGC) | 0.999557 | Random effect for regimen Ciprofloxacin + Tigecycline (CIP+TGC) | 1.01008 |
| Random effect for regimen Ceftazidime + Vancomycin (CAZ+VA) | 0.999626 | Random effect for regimen Ceftazidime + Vancomycin (CAZ+VA) | 1.00852 |
| Random effect for regimen Cefepime + Vancomycin (FEP+VA) | 1.00119 | Random effect for regimen Cefepime + Vancomycin (FEP+VA) | 1.0071 |
| Random effect for regimen Meropenem + Vancomycin (MEM+VA) | 0.999318 | Random effect for regimen Meropenem + Vancomycin (MEM+VA) | 1.00849 |
| Random effect for regimen Piperacillin/Tazobactam + Vancomycin (TZP+VA) | 0.999806 | Random effect for regimen Piperacillin/Tazobactam + Vancomycin (TZP+VA) | 1.00762 |
| Random effect for regimen Ceftazidime + Linezolid (CAZ+LNZ) | 1.00039 | Random effect for regimen Ceftazidime + Linezolid (CAZ+LNZ) | 1.00798 |
| Random effect for regimen Cefepime + Linezolid (FEP+LNZ) | 0.99929 | Random effect for regimen Cefepime + Linezolid (FEP+LNZ) | 1.00827 |
| Random effect for regimen Meropenem + Linezolid (MEM+LNZ) | 0.999733 | Random effect for regimen Meropenem + Linezolid (MEM+LNZ) | 1.0084 |
| Random effect for regimen Piperacillin/Tazobactam + Linezolid (TZP+LNZ) | 1.00029 | Random effect for regimen Piperacillin/Tazobactam + Linezolid (TZP+LNZ) | 1.00758 |
| Random effect for regimen Ceftazidime (CAZ) | 0.99918 | Random effect for regimen Ceftazidime (CAZ) | 0.99976 |
| Random effect for regimen Cefepime (FEP) | 0.999561 | Random effect for regimen Cefepime (FEP) | 0.994559 |
| Random effect for regimen Meropenem (MEM) | 1.004113 | Random effect for regimen Meropenem (MEM) | 1.00229 |
| Random effect for regimen Piperacillin/Tazobactam (TZP) | 0.999496 | Random effect for regimen Piperacillin/Tazobactam (TZP) | 1.00451 |

Table S6. Univariate Analysis Regarding In-Hospital Mortality and Extended Hospital Stay.

| Variable | **In-hospital Mortality** | | | | **Extended Hospital Stay.** | | | |
| --- | --- | --- | --- | --- | --- | --- | --- | --- |
| Total events  (n=197) | Non-Survivors  (n=68) | Survivors (n=129) | p value | Total (n=129) | Extended Hospital stay (Yes) (n=28) | Extended Hospital stay (No) (n=101) | p value |
| Age - Median (IQR) | 44.0 (35.0-56.0) | 44.5 (38.25-58.0) | 44.0 (32.0-53.5) | 0.423 | 44.0 (32.0-53.5) | 39.5 (30.7-50.2) | 47.0 (32.0-56.0) | 0.070 |
| Male - N (%) | 140 (71.1) | 49 (72.1) | 91 (70.5) | 0.953 | 91 (70.5) | 21 (75.0) | 70 (59.3) | 0.881 |
| Charlson Comorbidity Index - Median (IQR) | 1.0 (0.0-2.0) | 1.0 (0.0-3.0) | 1.0 (0.0-2.0) | 0.383 | 1.0 (0.0-2.0) | 0.0 (0.0-0.8) | 1.0 (0.0-2.0) | **0.007** |
| Initial Empiric Inappropriate Treatment - N (%) | 89 (45.2) | 35 (51.5) | 54 (41.9) | 0.229 | 54 (41.9) | 41 (40.6) | 13 (46.4) | 0.66 |
| Inappropriate Treatment for VAP - N (%) | 28 (14.2) | 19 (27.9) | 9 (7) | **<0.001** | 9 (6.9) | 1 (3.6) | 8 (7.9) | 0.683 |
| Days to Correct Treatment - Median (IQR) | 0.0 (0.0-3.0) | 0.0 (0.0-3.0) | 0.0 (0.0-3.0) | 0.199 | 0.0 (0.0-3.0) | 0.0 (0.0-6.0) | 0.0 (0.0-2.0) | **0.083** |
| Days from IMV to VAP development - Median (IQR) | 8.0 (4.0-15.0) | 11.0 (5.0-16.0) | 7.0 (4.0-14.0) | 0.081 | 7.0 (4.0-14.5) | 6.5 (4.0-11.7) | 8.0 (4.0-15.0) | 0.966 |
| Days of IMV after VAP development- Median (IQR) | 9.0 (3.0-14.0) | 6.0 (2.0-12.0) | 10.0 (5.0-15.0) | **0.002** | 10 (5.0-15.0) | 20.0 (11.7-26.0) | 9.0 (4.0-13.0) | **<0.001** |
| Need of Vasopressors - N (%) | 80 (40.6) | 51 (63.7) | 29 (22.5) | **<0.001** | 29 (22.5) | 8 (28.6) | 21 (20.8) | 0.444 |
| SOFA score - Median (IQR) | 5.0 (3.0-7.0) | 7.0 (6.0-9.0) | 4.0 (2.0-5.0) | **<0.001** | 4 (2.0-5.0) | 4.0 (2.0-6.0) | 4.0 (2.0-5.0) | 0.750 |
| PaO2/FiO2 Ratio - Median (IQR) | 232.5 (175.5-303.0) | 173.0 (104.5-280.5) | 250.5 (207.8-313.0) | **<0.00**1 | 250.5 (207.0-313.0) | 233.0 (188.0-313.0) | 251.0 (208.5-323.0) | 0.437 |
| ARDS diagnosis - N (%) | 52.0 (26.5) | 35.0 (51.5) | 17.0 (13.3) | **<0.00**1 | 17 (13.3) | 5 (18.5) | 12 (11.9) | 0.353 |
| SARS-CoV-2 Infection - N (%) | 24 (12.1) | 9 (13.2) | 15 (11.6) | 0.542 | 12 (9.3) | 3(10.7) | 9 (8.9) | 0.693 |
| Multiple Isolates - N (%) | 81 (41.1) | 27 (39.7) | 54 (41.9) | 0.888 | 54 (41.9) | 16 (57.1) | 38 (37.6) | 0.0.83 |
| Days of hospitalization after VAP event - Median (IQR) | 12.0 (6.0-22.0) | 6.0 (3.0-12.0) | 15.0 (10.0-29.0) | **<0.00**1 | 15.0 (10.0-29.0) | 36.0 (34.0-57-5) | 12.0 (9.0-17.5) | **<0.001** |
| *Acinetobacter baumannii* - N (%) | 71 (36.0) | 33 (48.5) | 38 (29.5) | **0.012** | 23 (17.8) | 7 (5.4) | 16 (15.8) | 0.273 |
| *Pseudomonas aeruginosa* - N (%) | 36 (18.3) | 13 (19.1) | 23 (17.8) | 0.977 | 36 (100.0%) | 3 (20.00%) | 33 (28.95%) | 0.744 |
| Enterobacterales - N (%) | 52 (26.4) | 13 (19.1) | 39 (30.2) | 0.130 | 39 (30.2) | 6 (21.4) | 33 (32.7) | 0.353 |
| *Staphylococcus aureus* - N (%) | 20 (10.2) | 3 (4.4) | 17 (13.2) | 0.091 | 17 (13.2) | 4 (14.3) | 13 (12.9) | 0.763 |
| *Stenotrophomonas maltophilia* - N (%) | 16 (8.1) | 6 (8.8) | 10 (7.8) | 1.0 | 10 (7.8) | 1 (3.6) | 9 (8.9) | 0.689 |
| SOFA, Sequential Organ Failure Assessment score. ARDS, Acute Respiratory Distress Syndrome. SARS-CoV-2, Severe Acute Respiratory Syndrome Coronavirus 2. VAP, Ventilator-Associated Pneumonia. IMV, Invasive Mechanical Ventilation.  Bold values are for statistically significant variables. | | | | | | | | |

Figure S1. Monte Carlo Markov Chains (MCMC) Trace Plots of the WISCA Model Parameters.


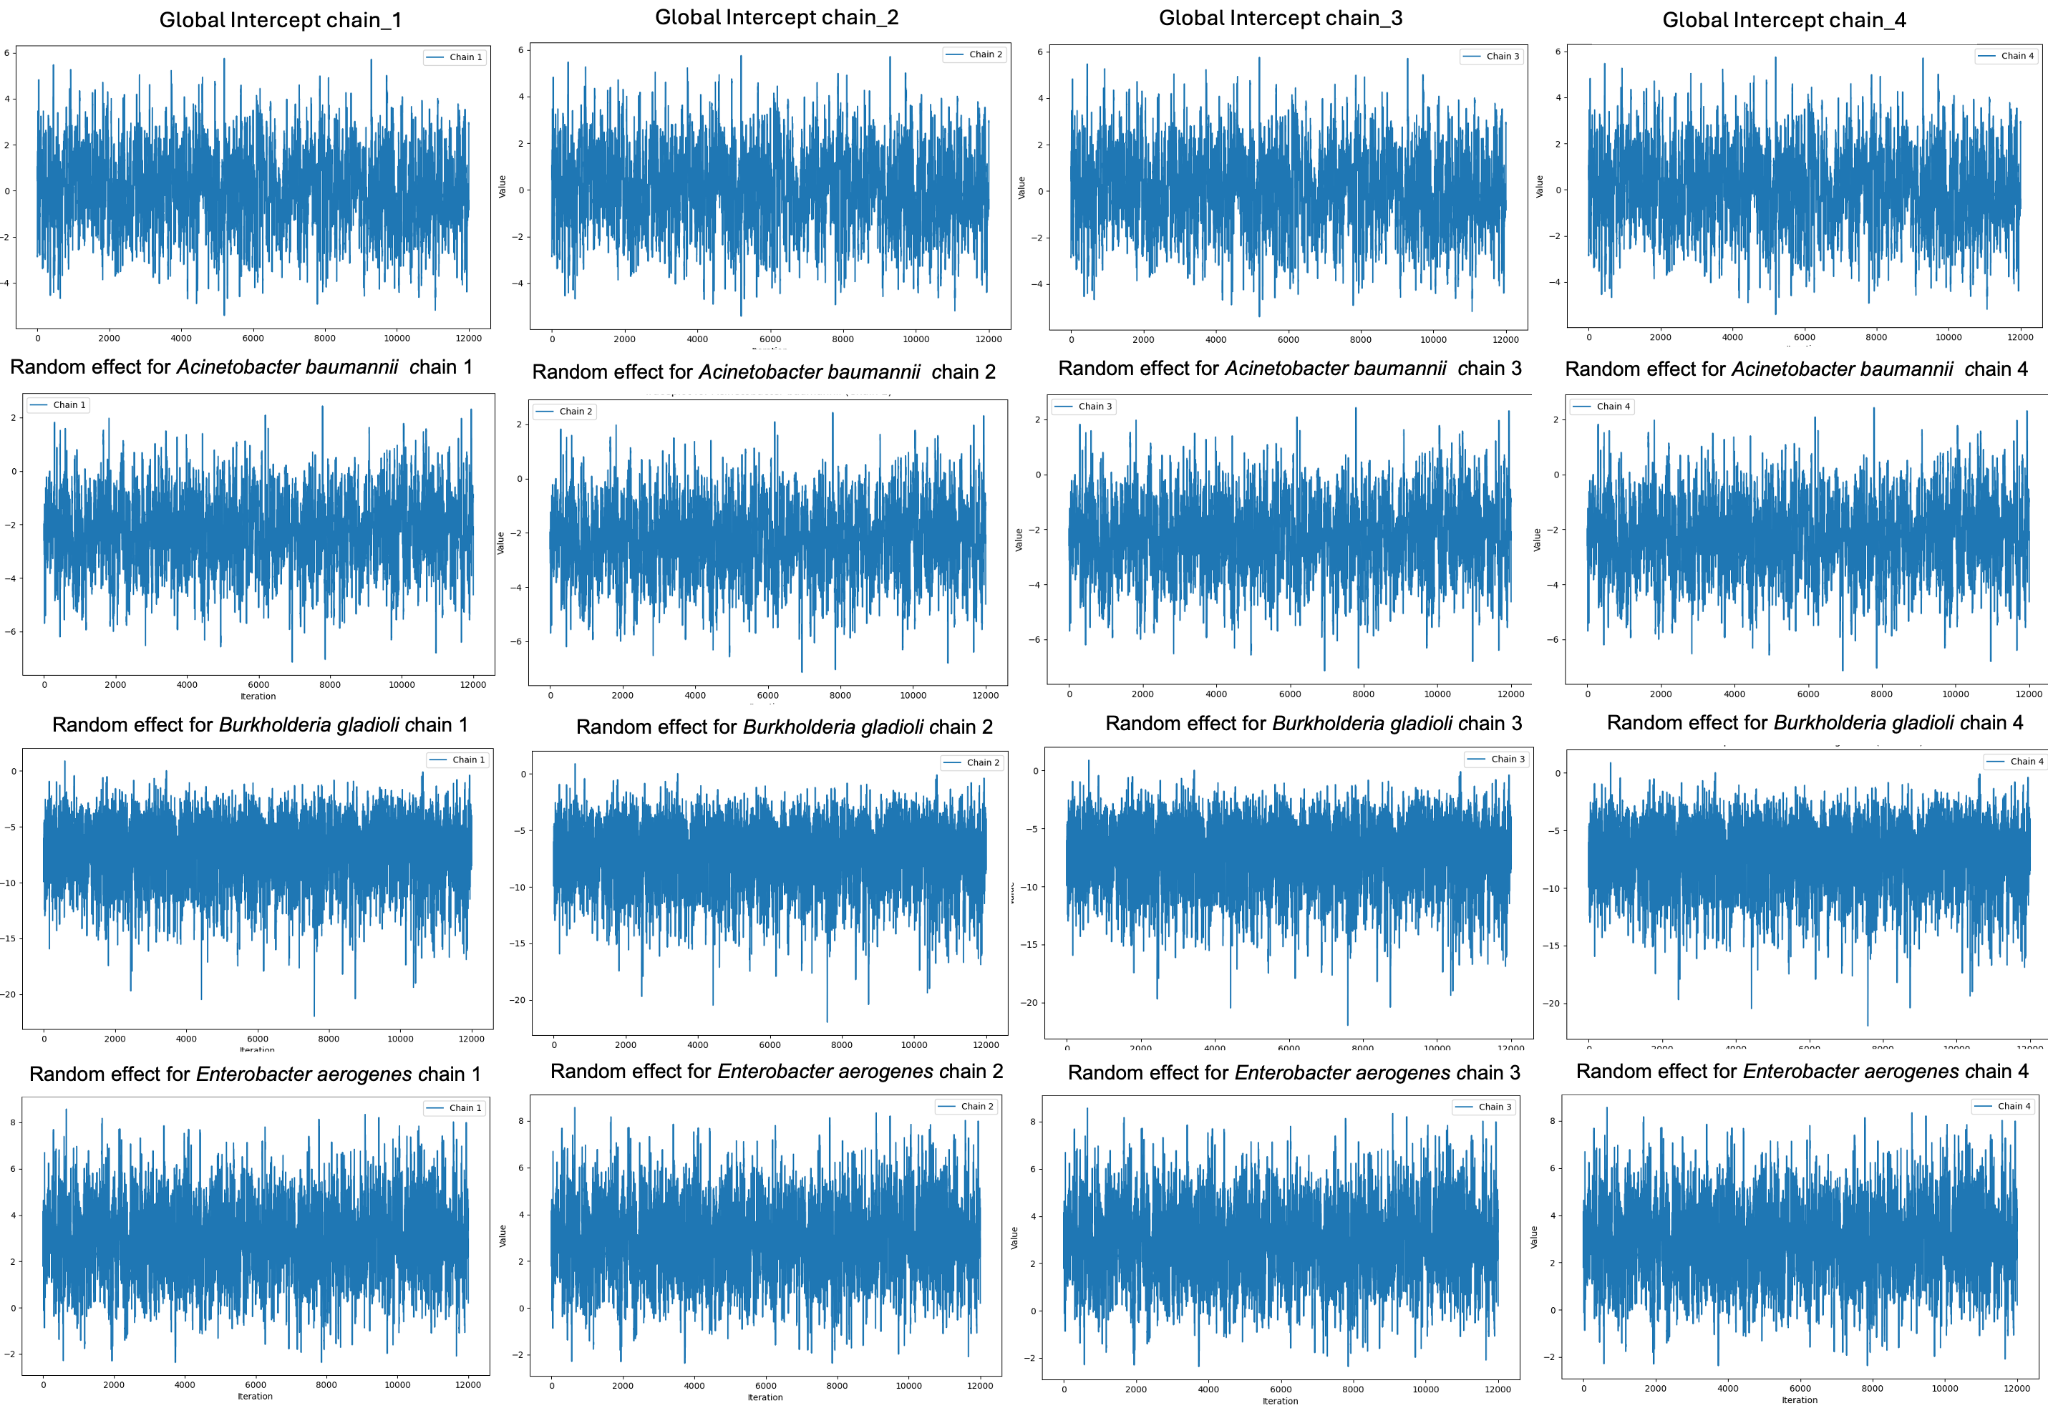


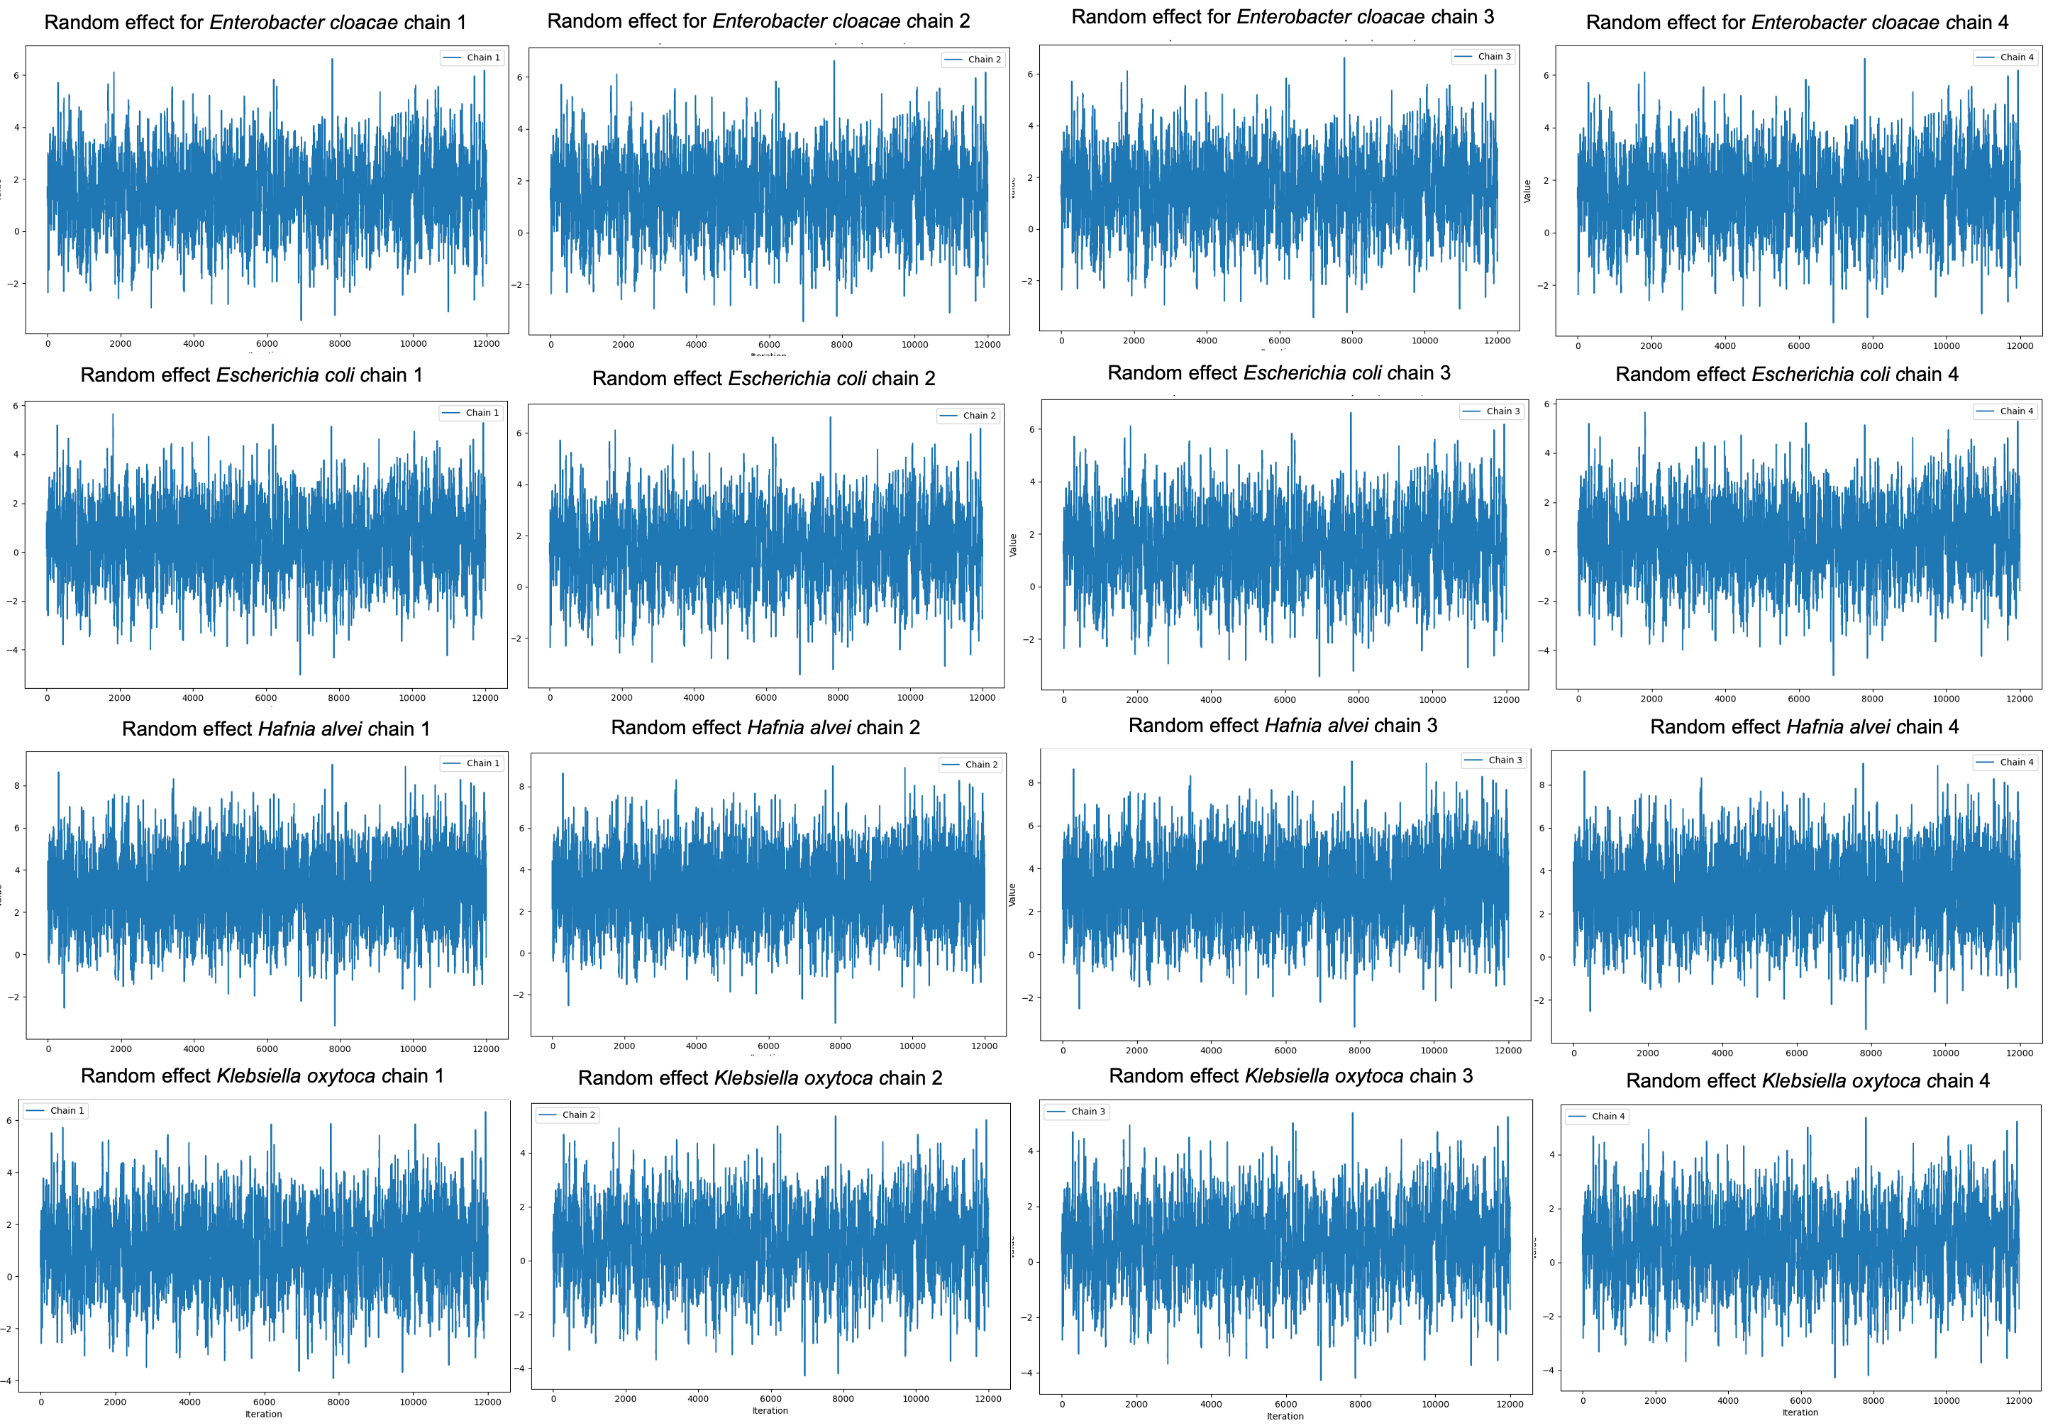


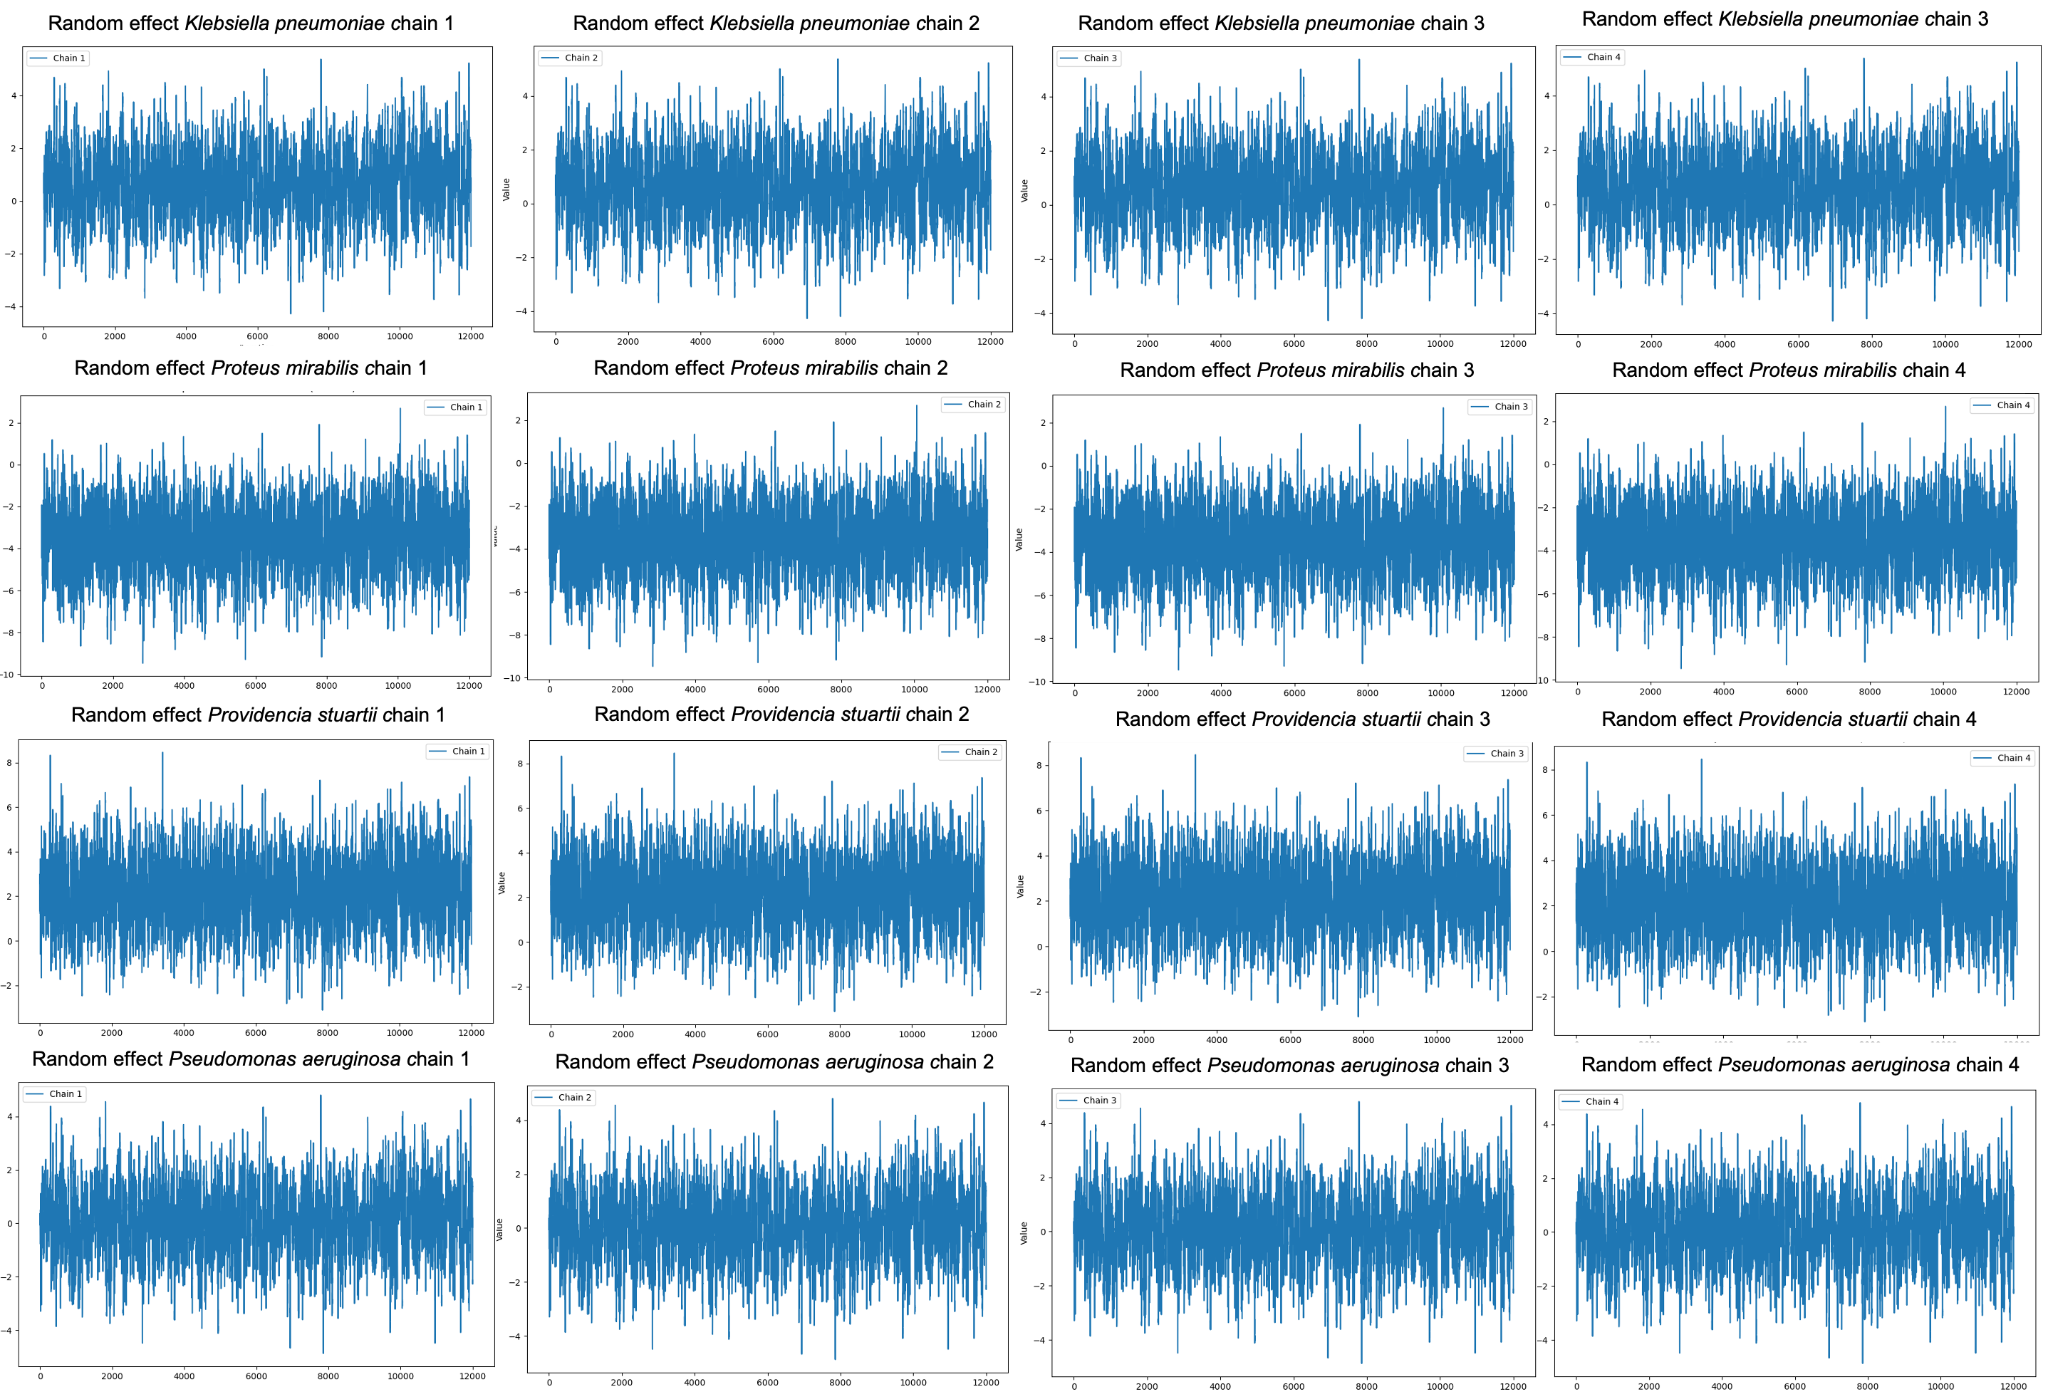


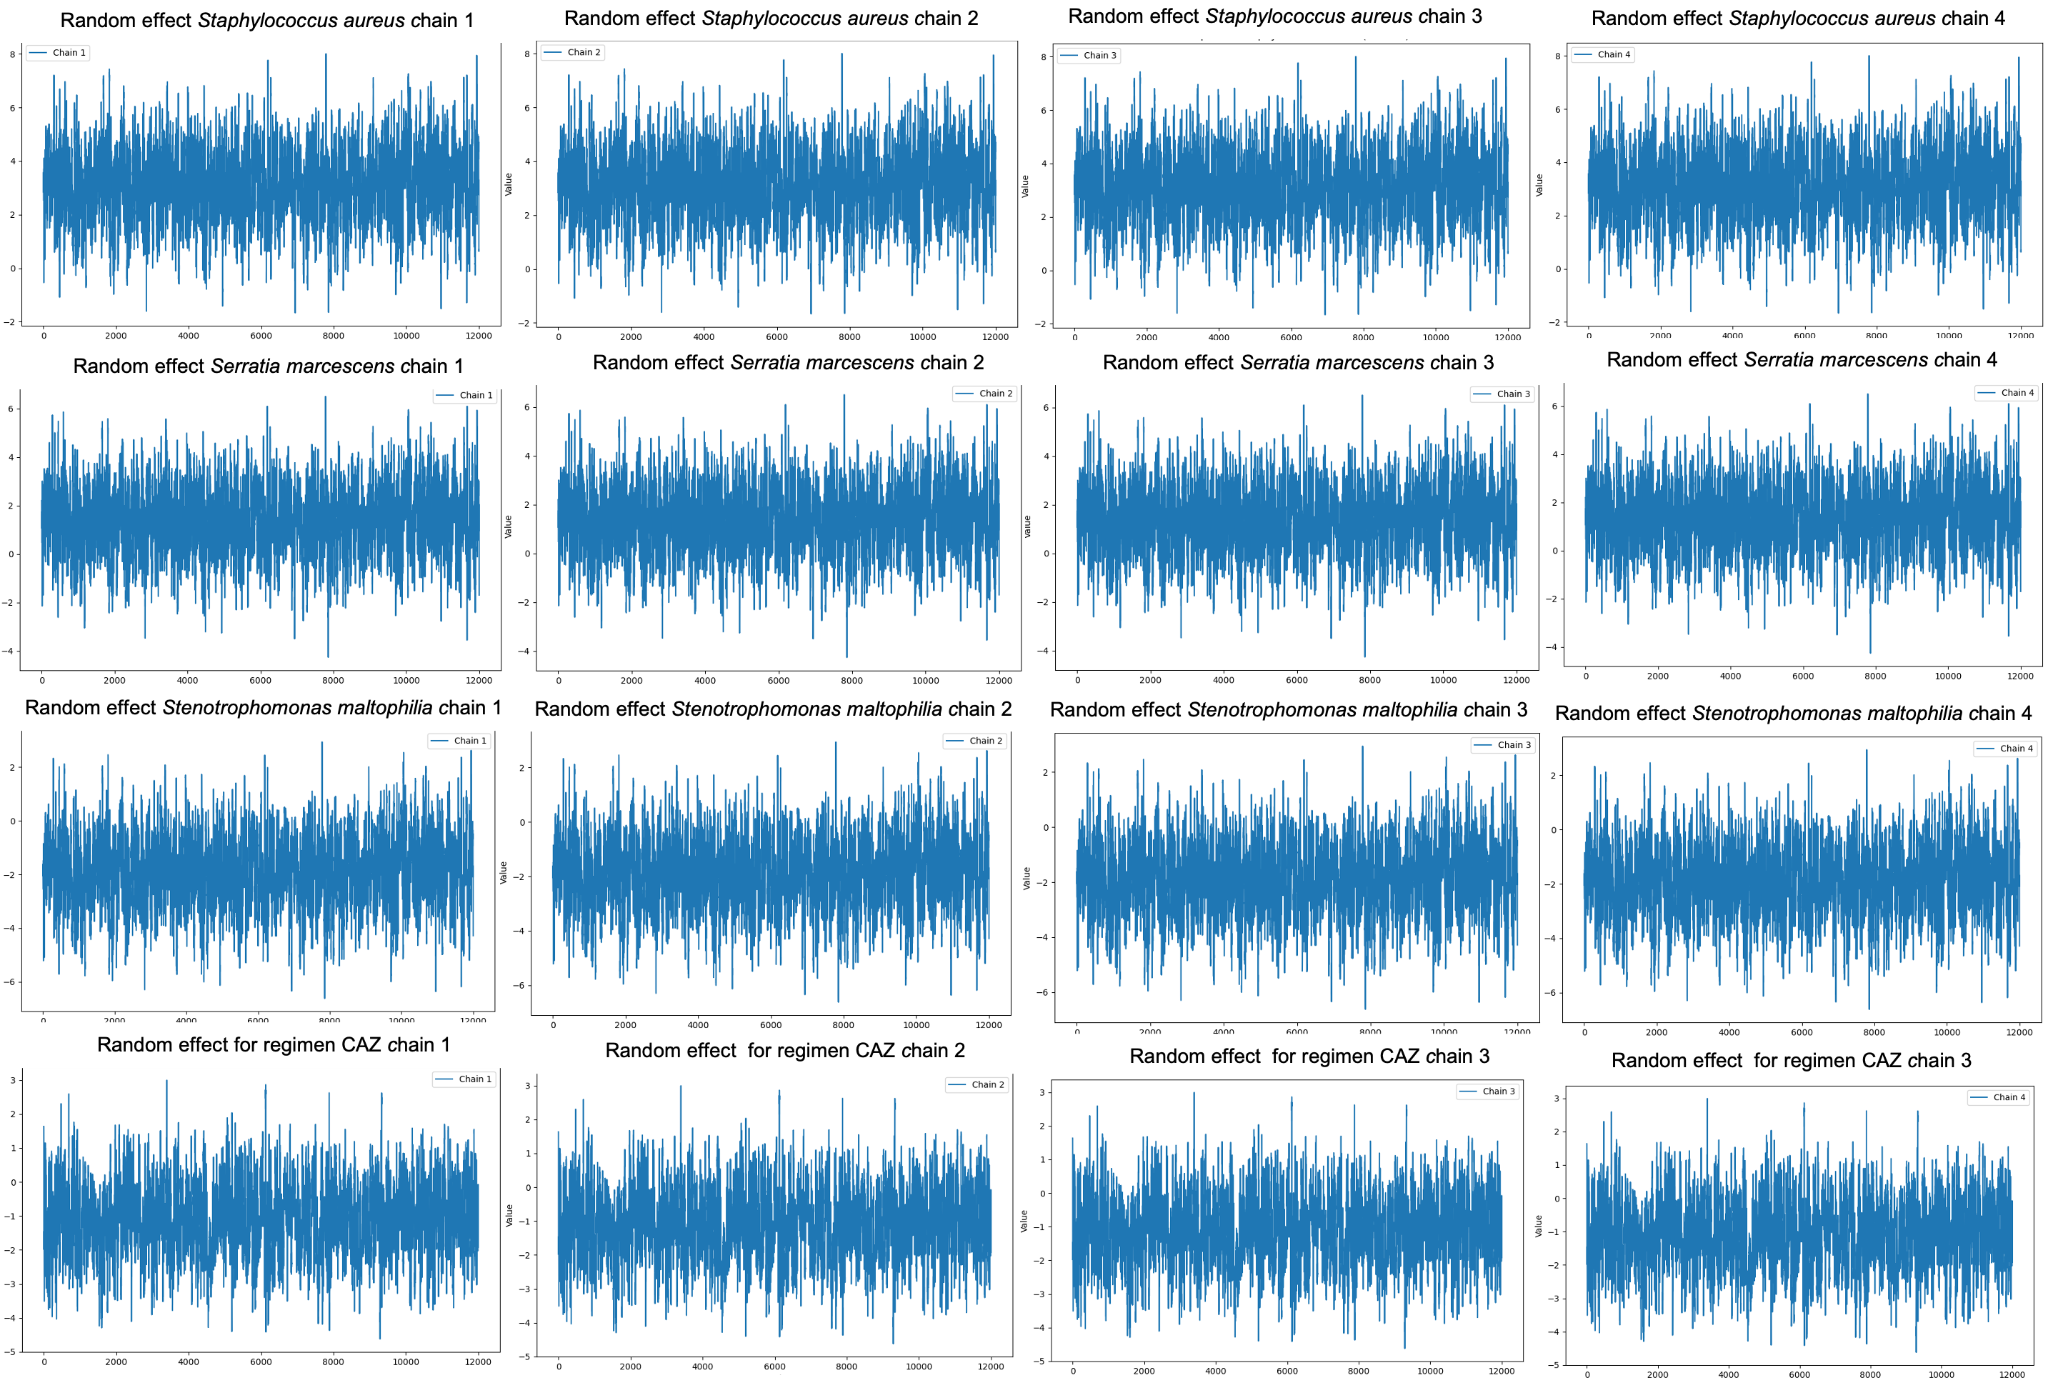


**
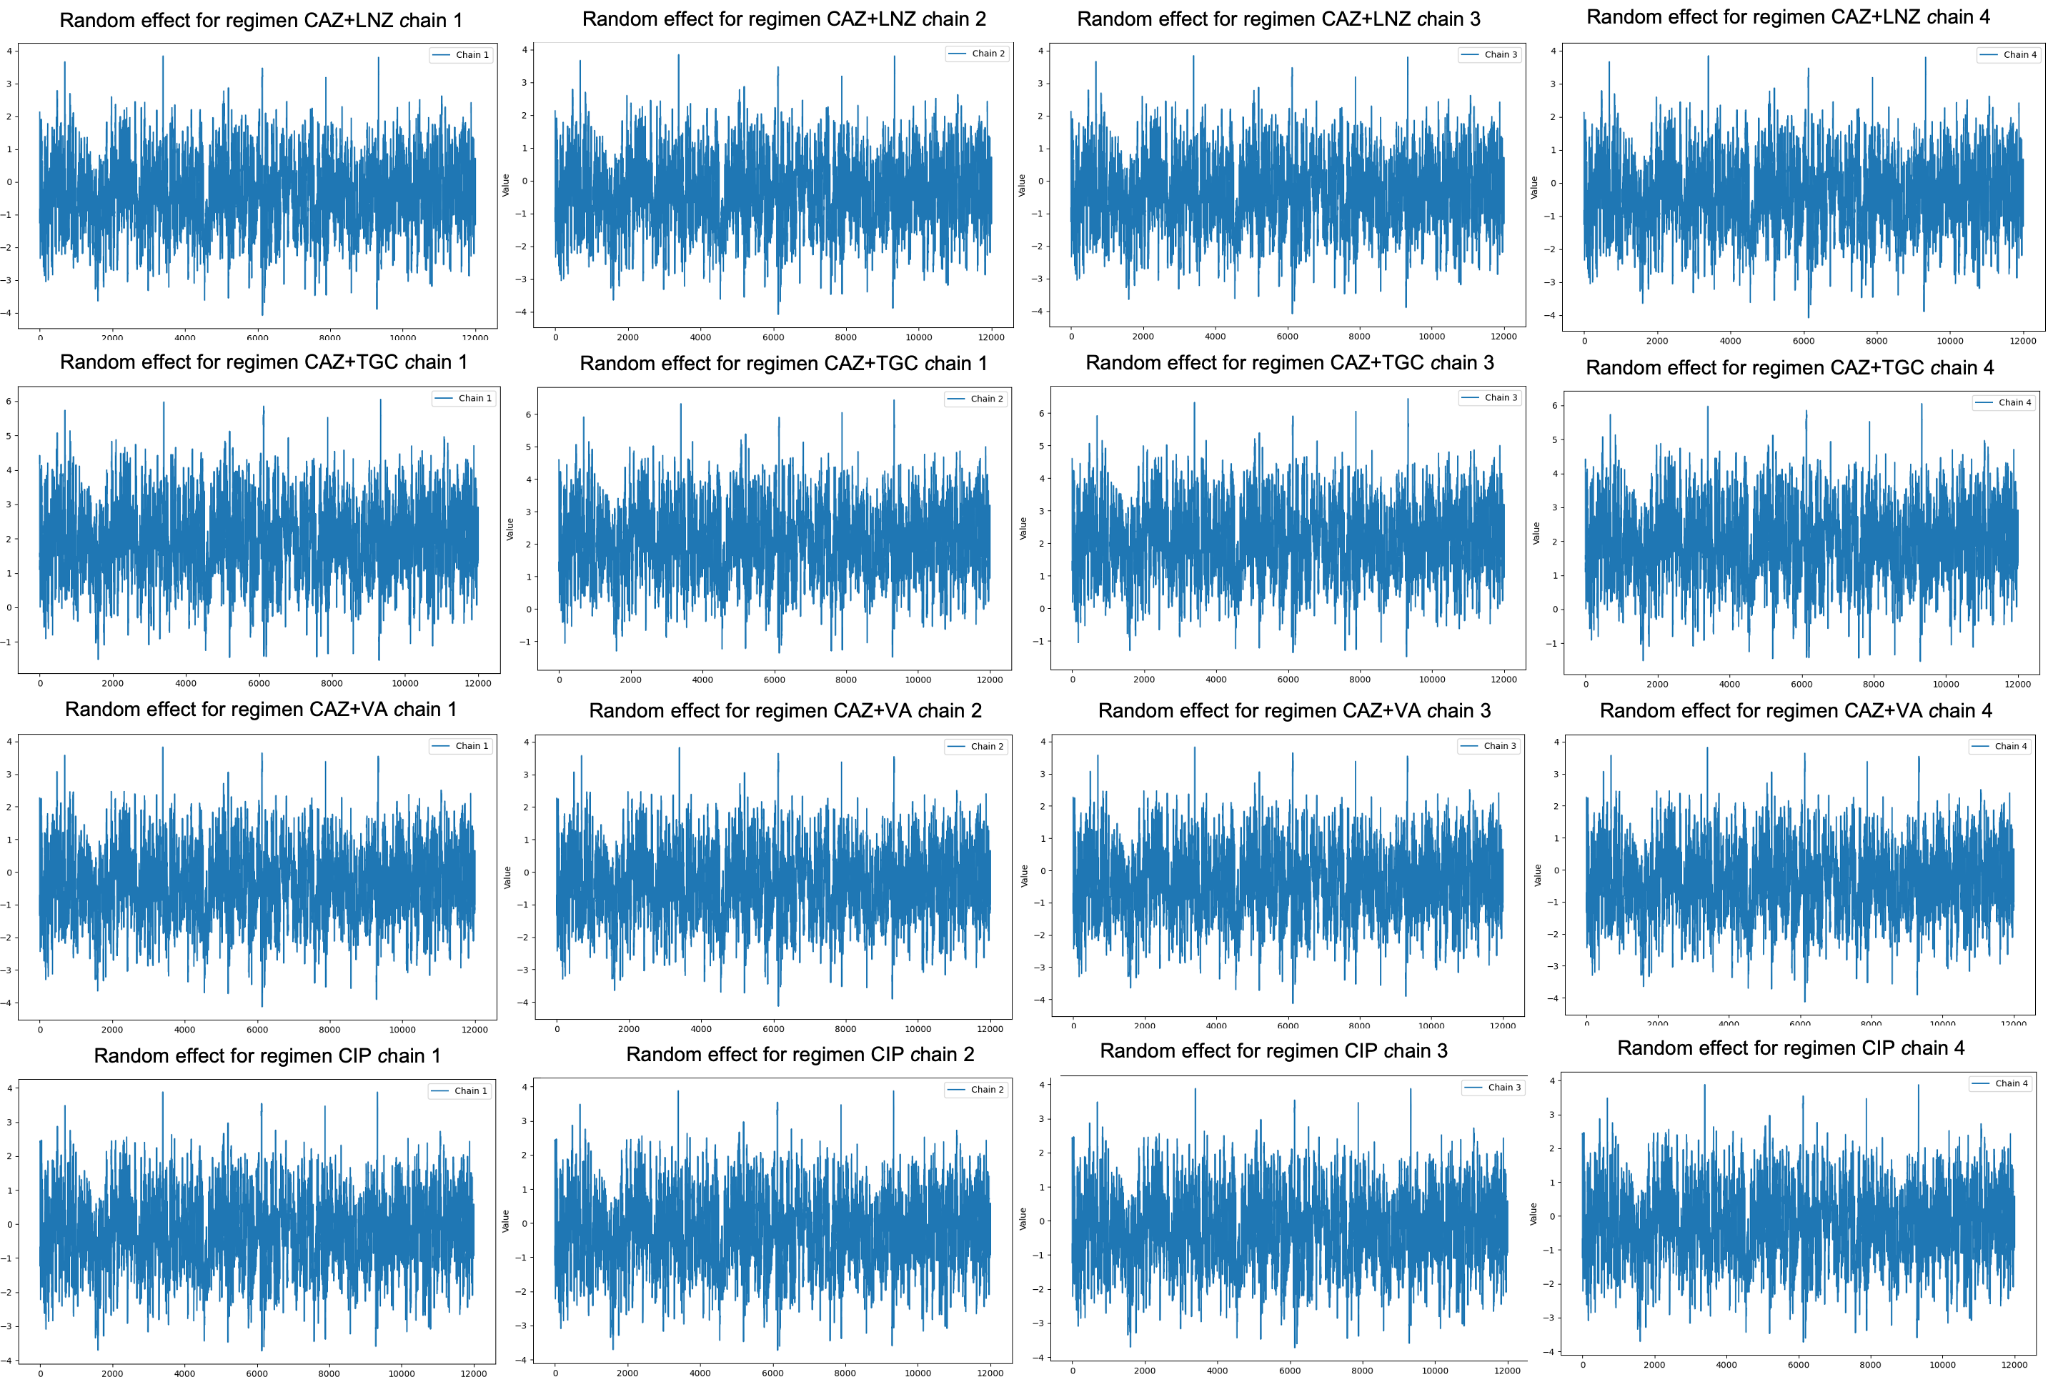
**

**
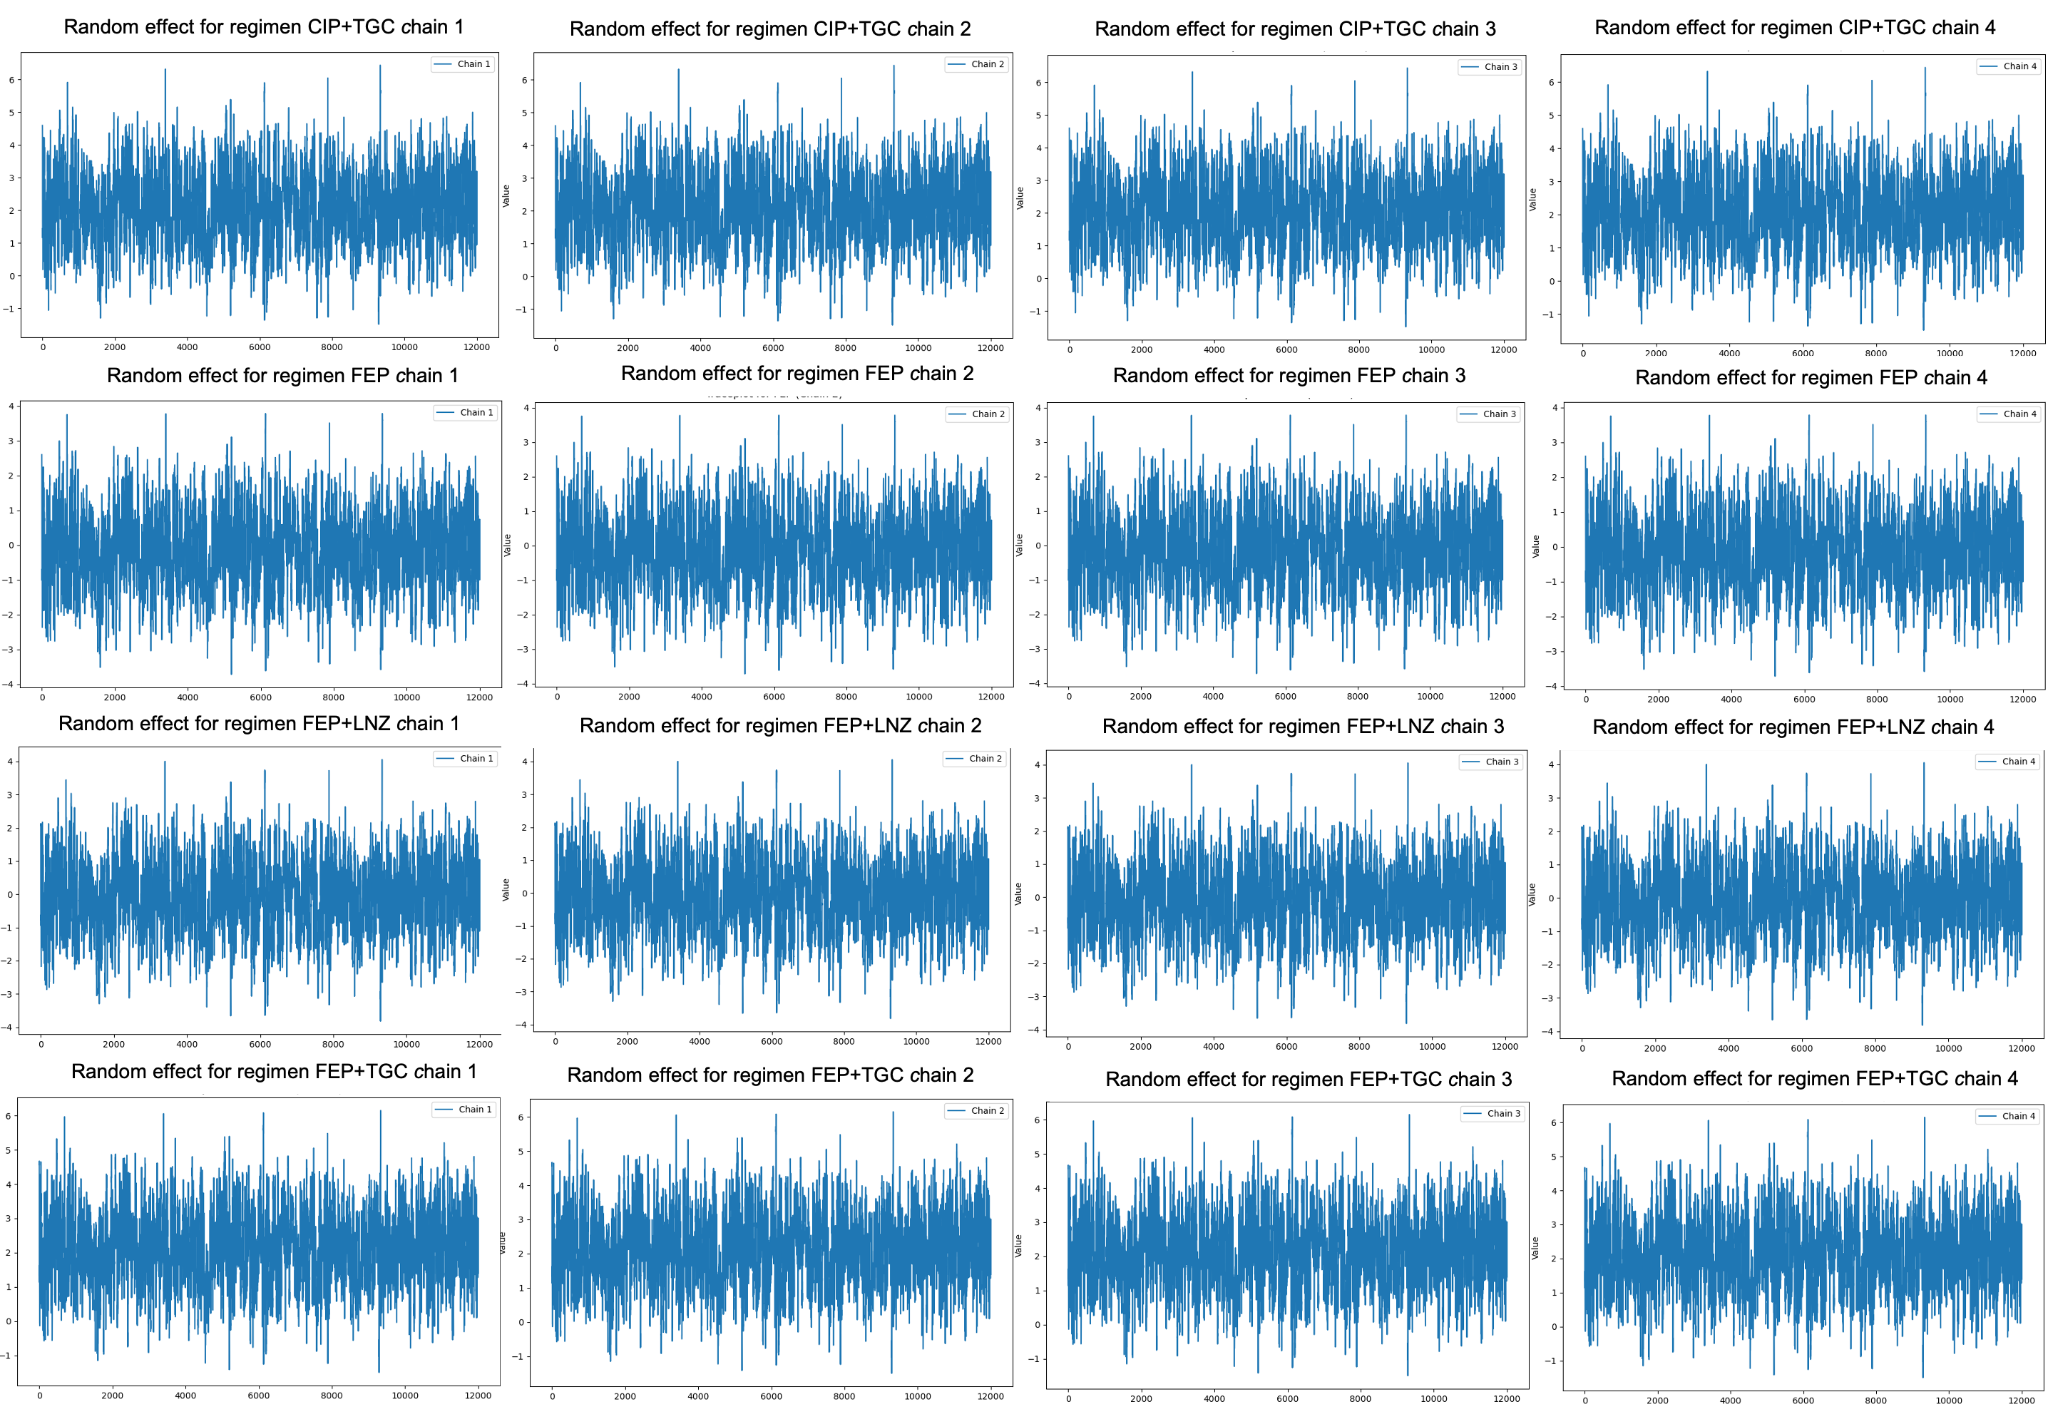
**

**
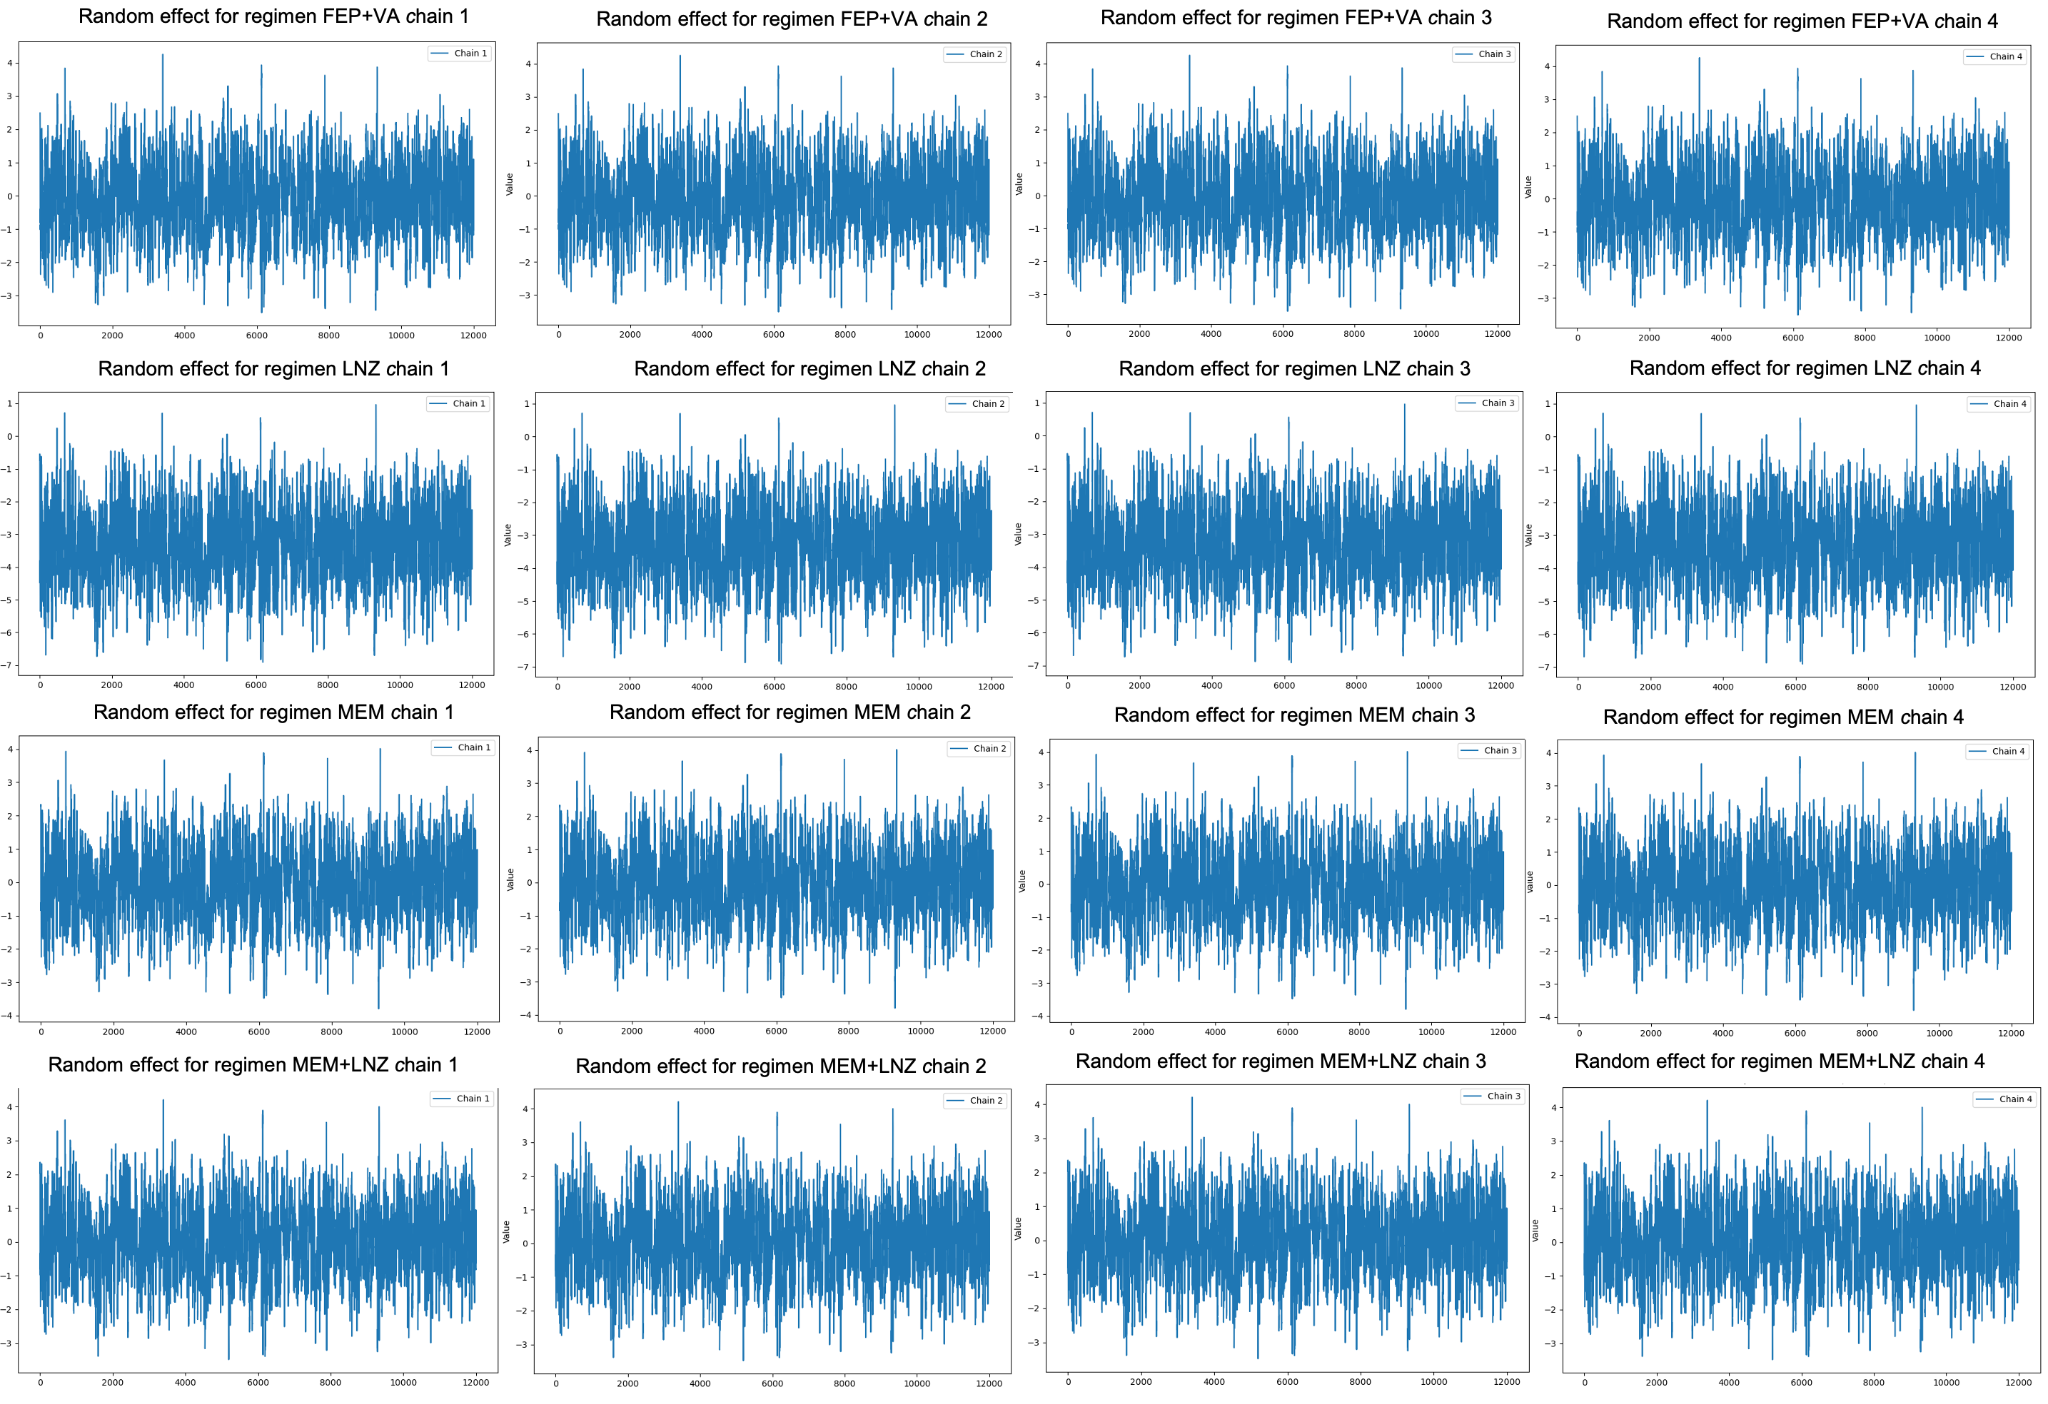
**

**
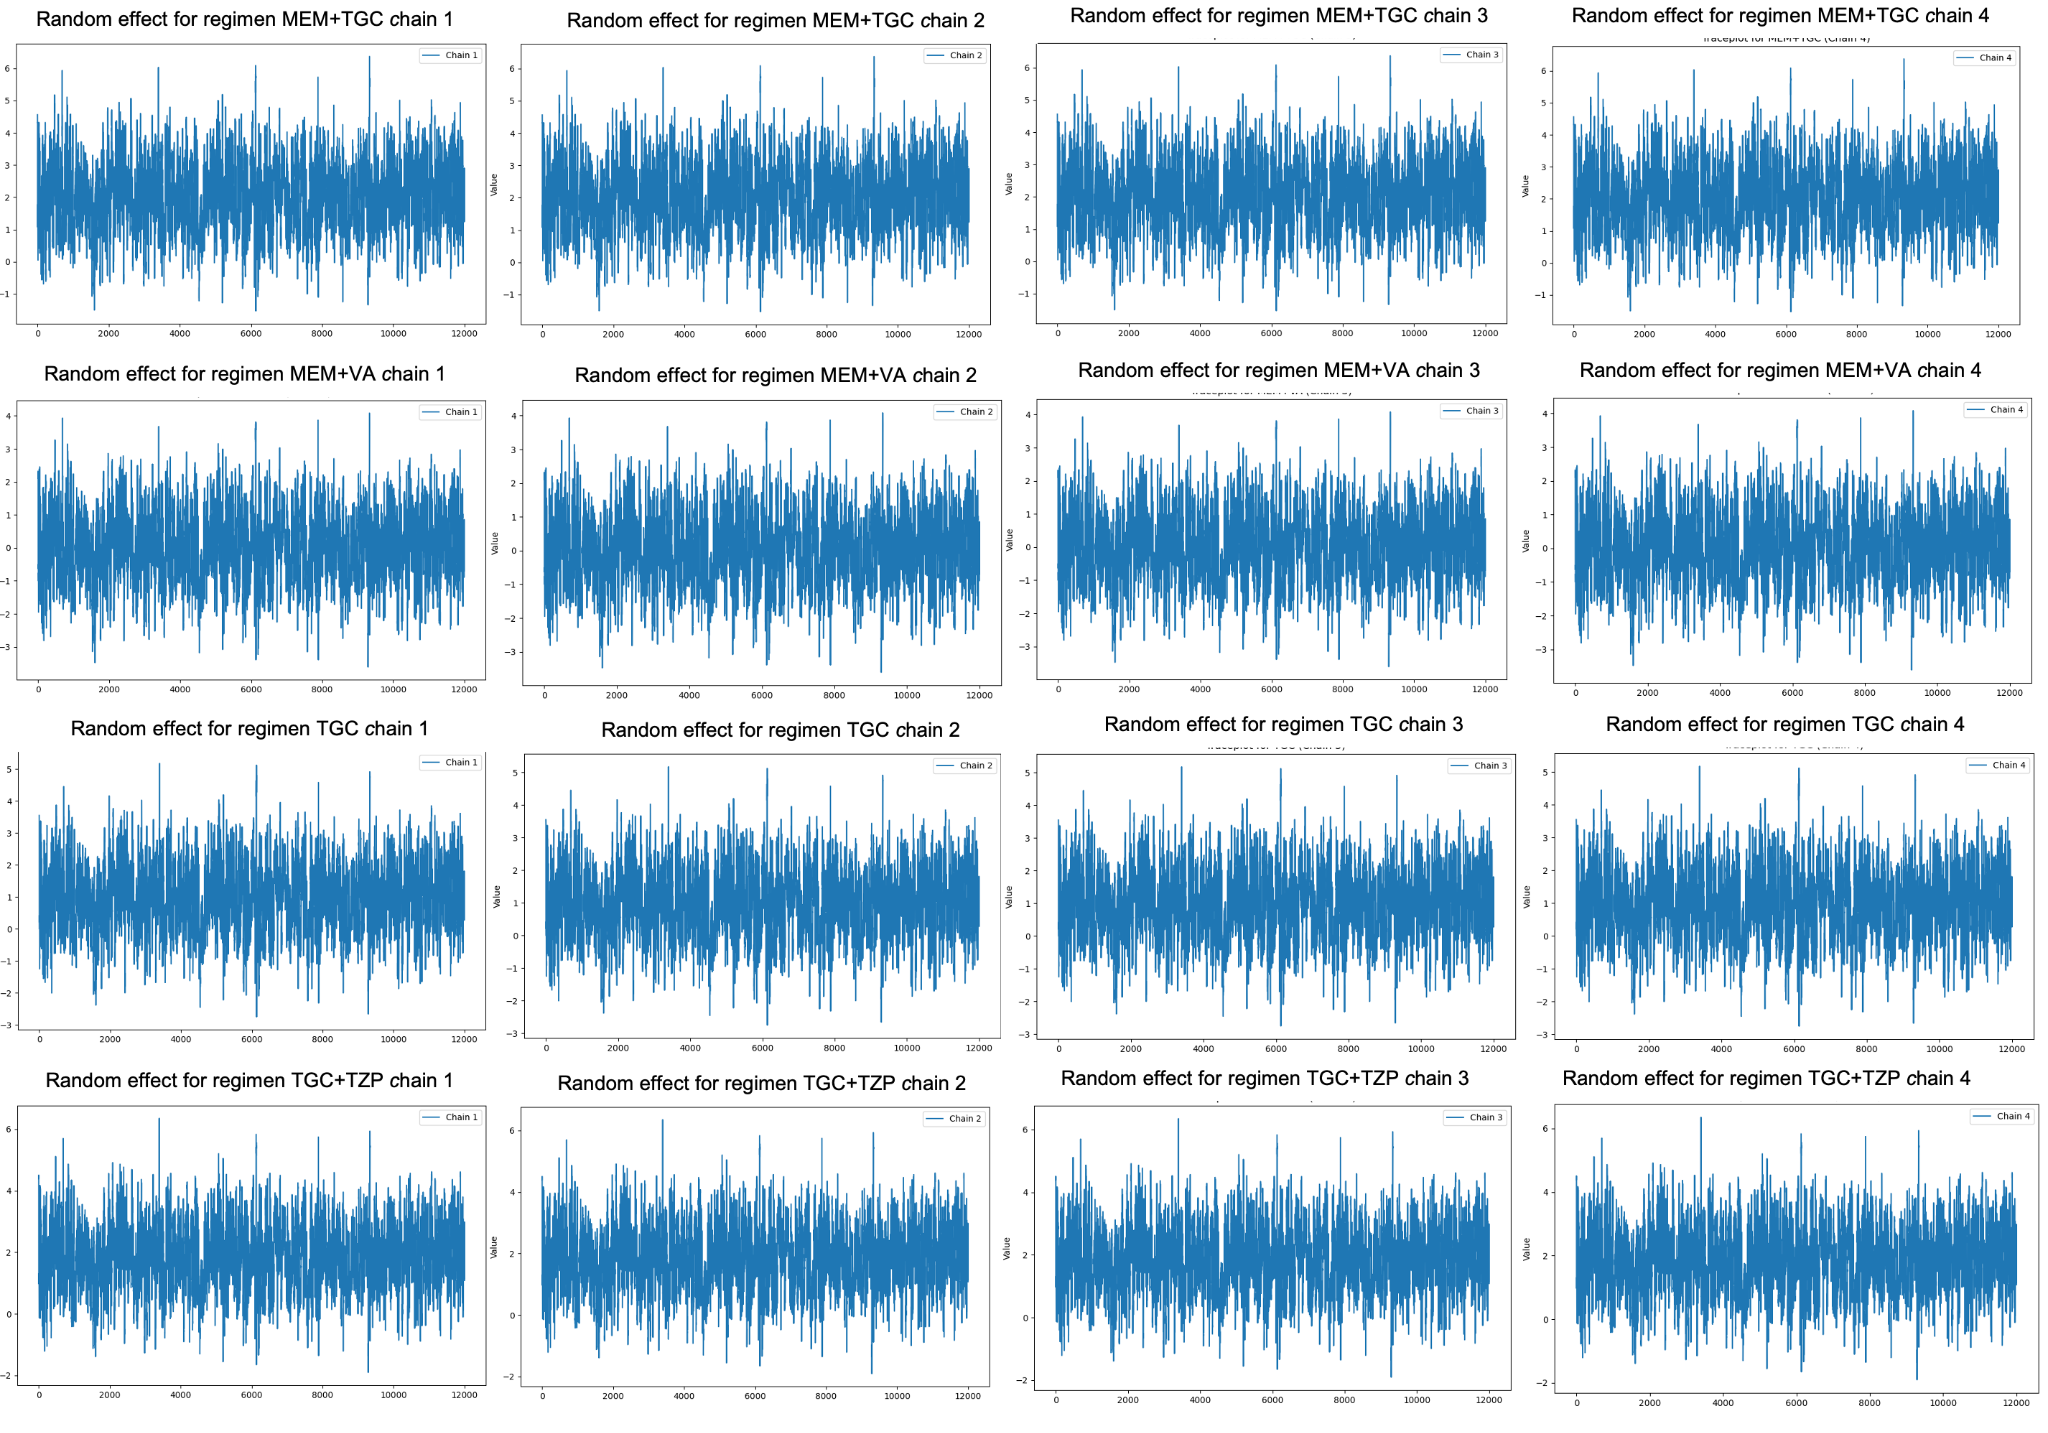
**

**
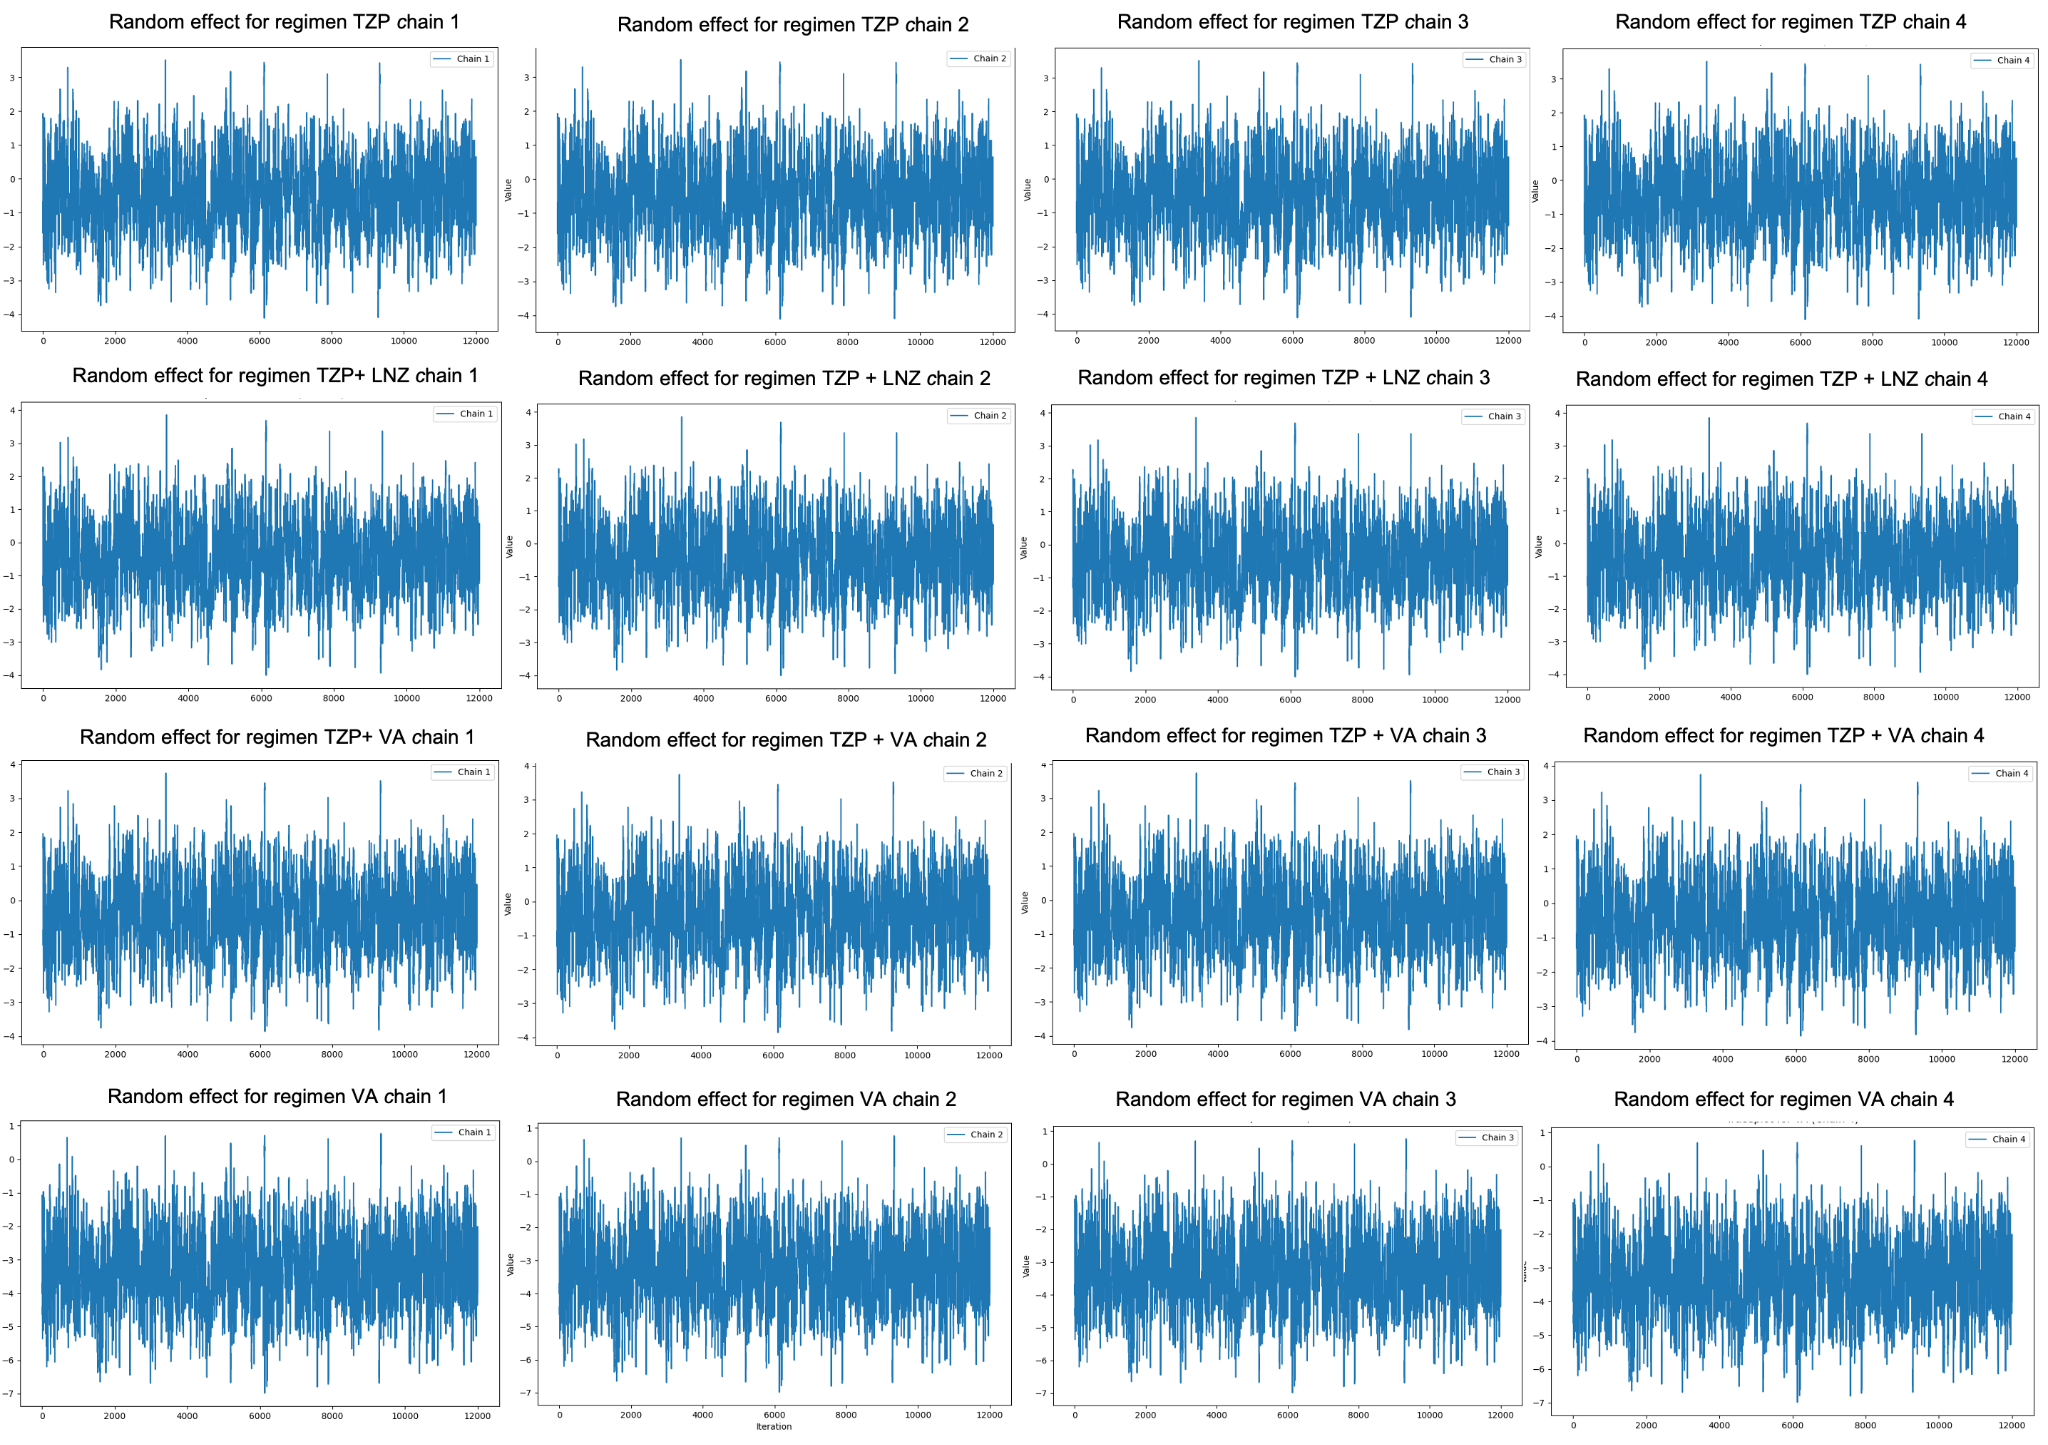

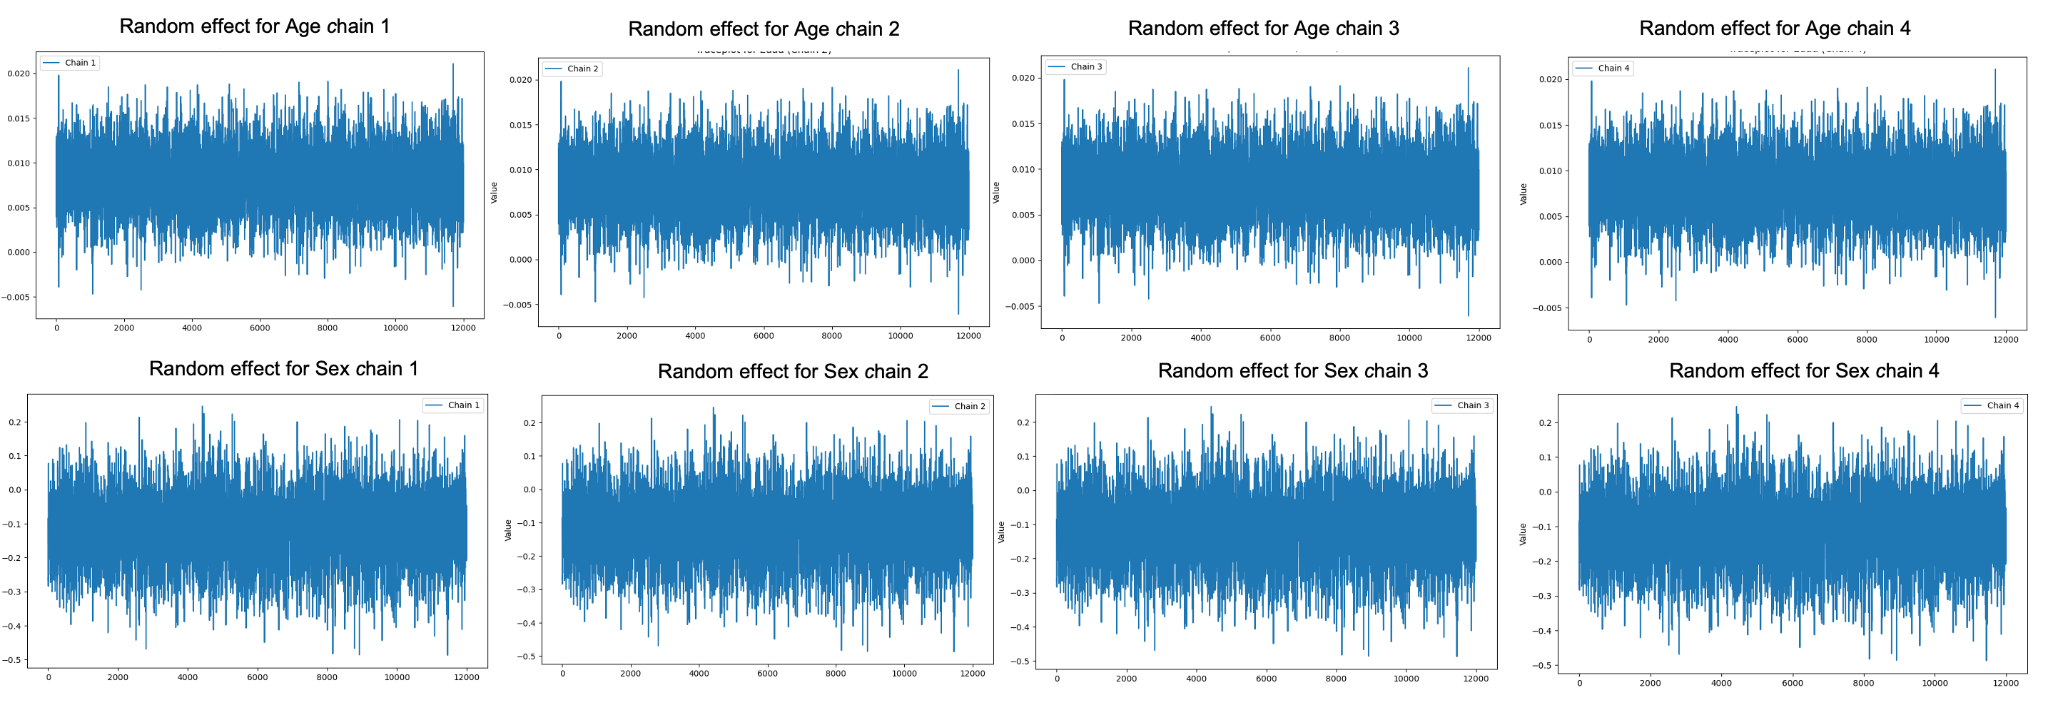
**

Figure S2. Density plots of the posterior distributions of the parameters of the model.


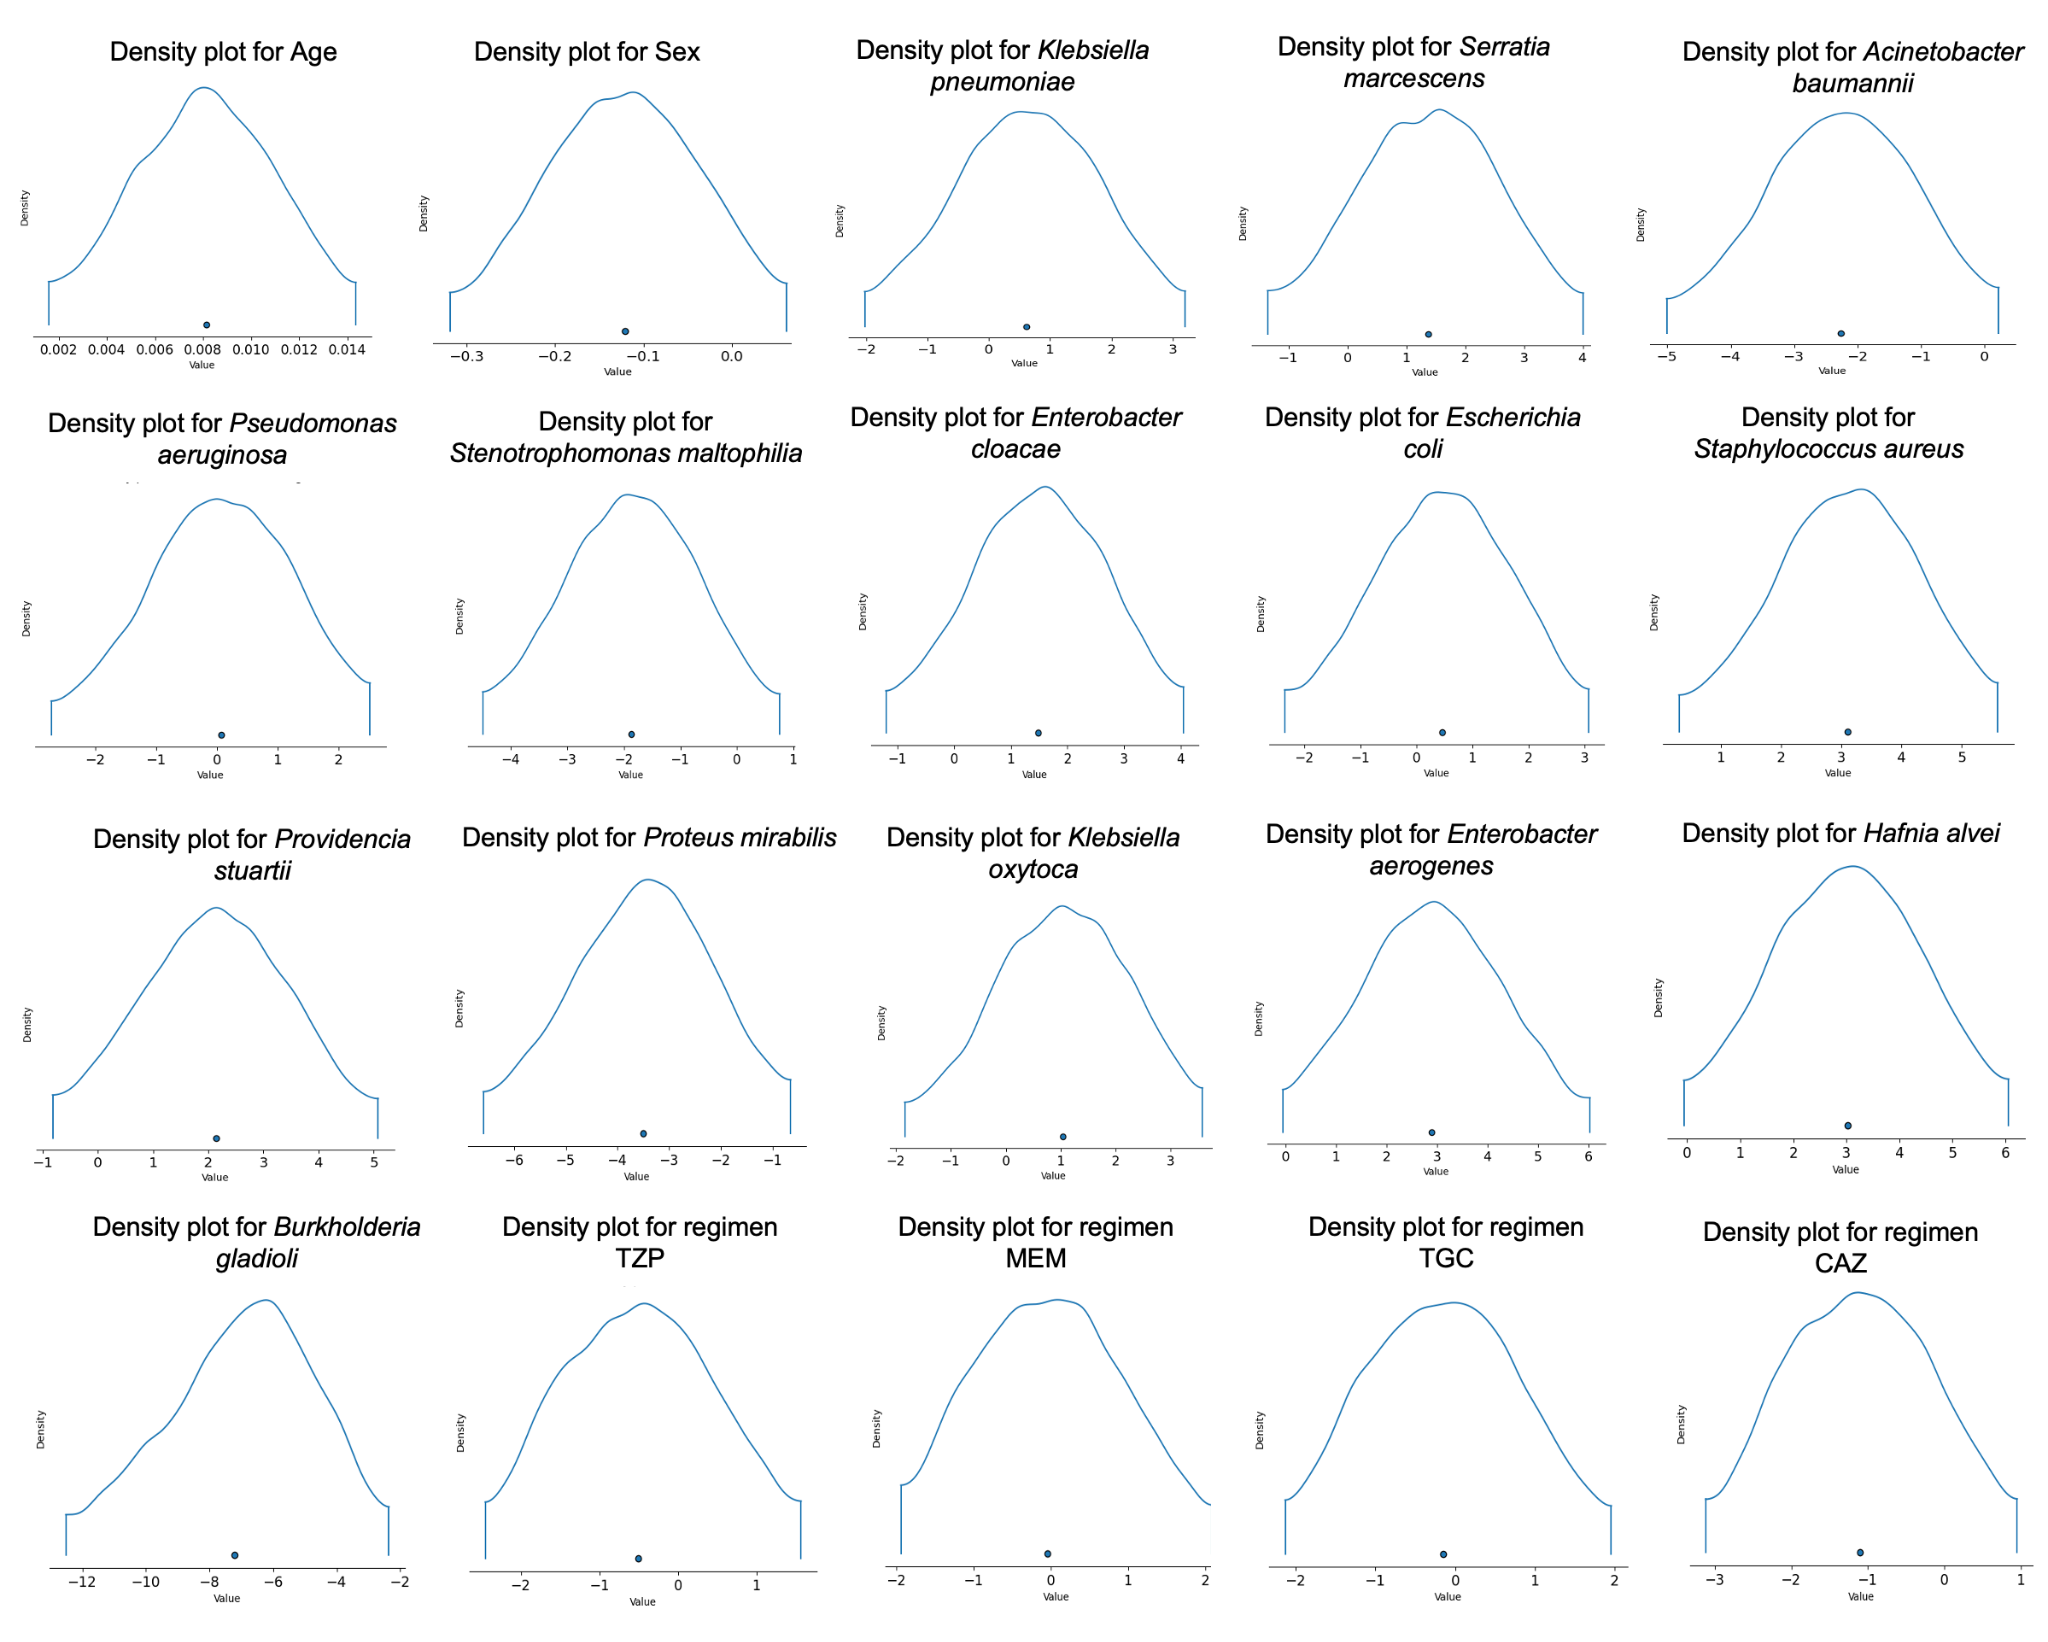


**
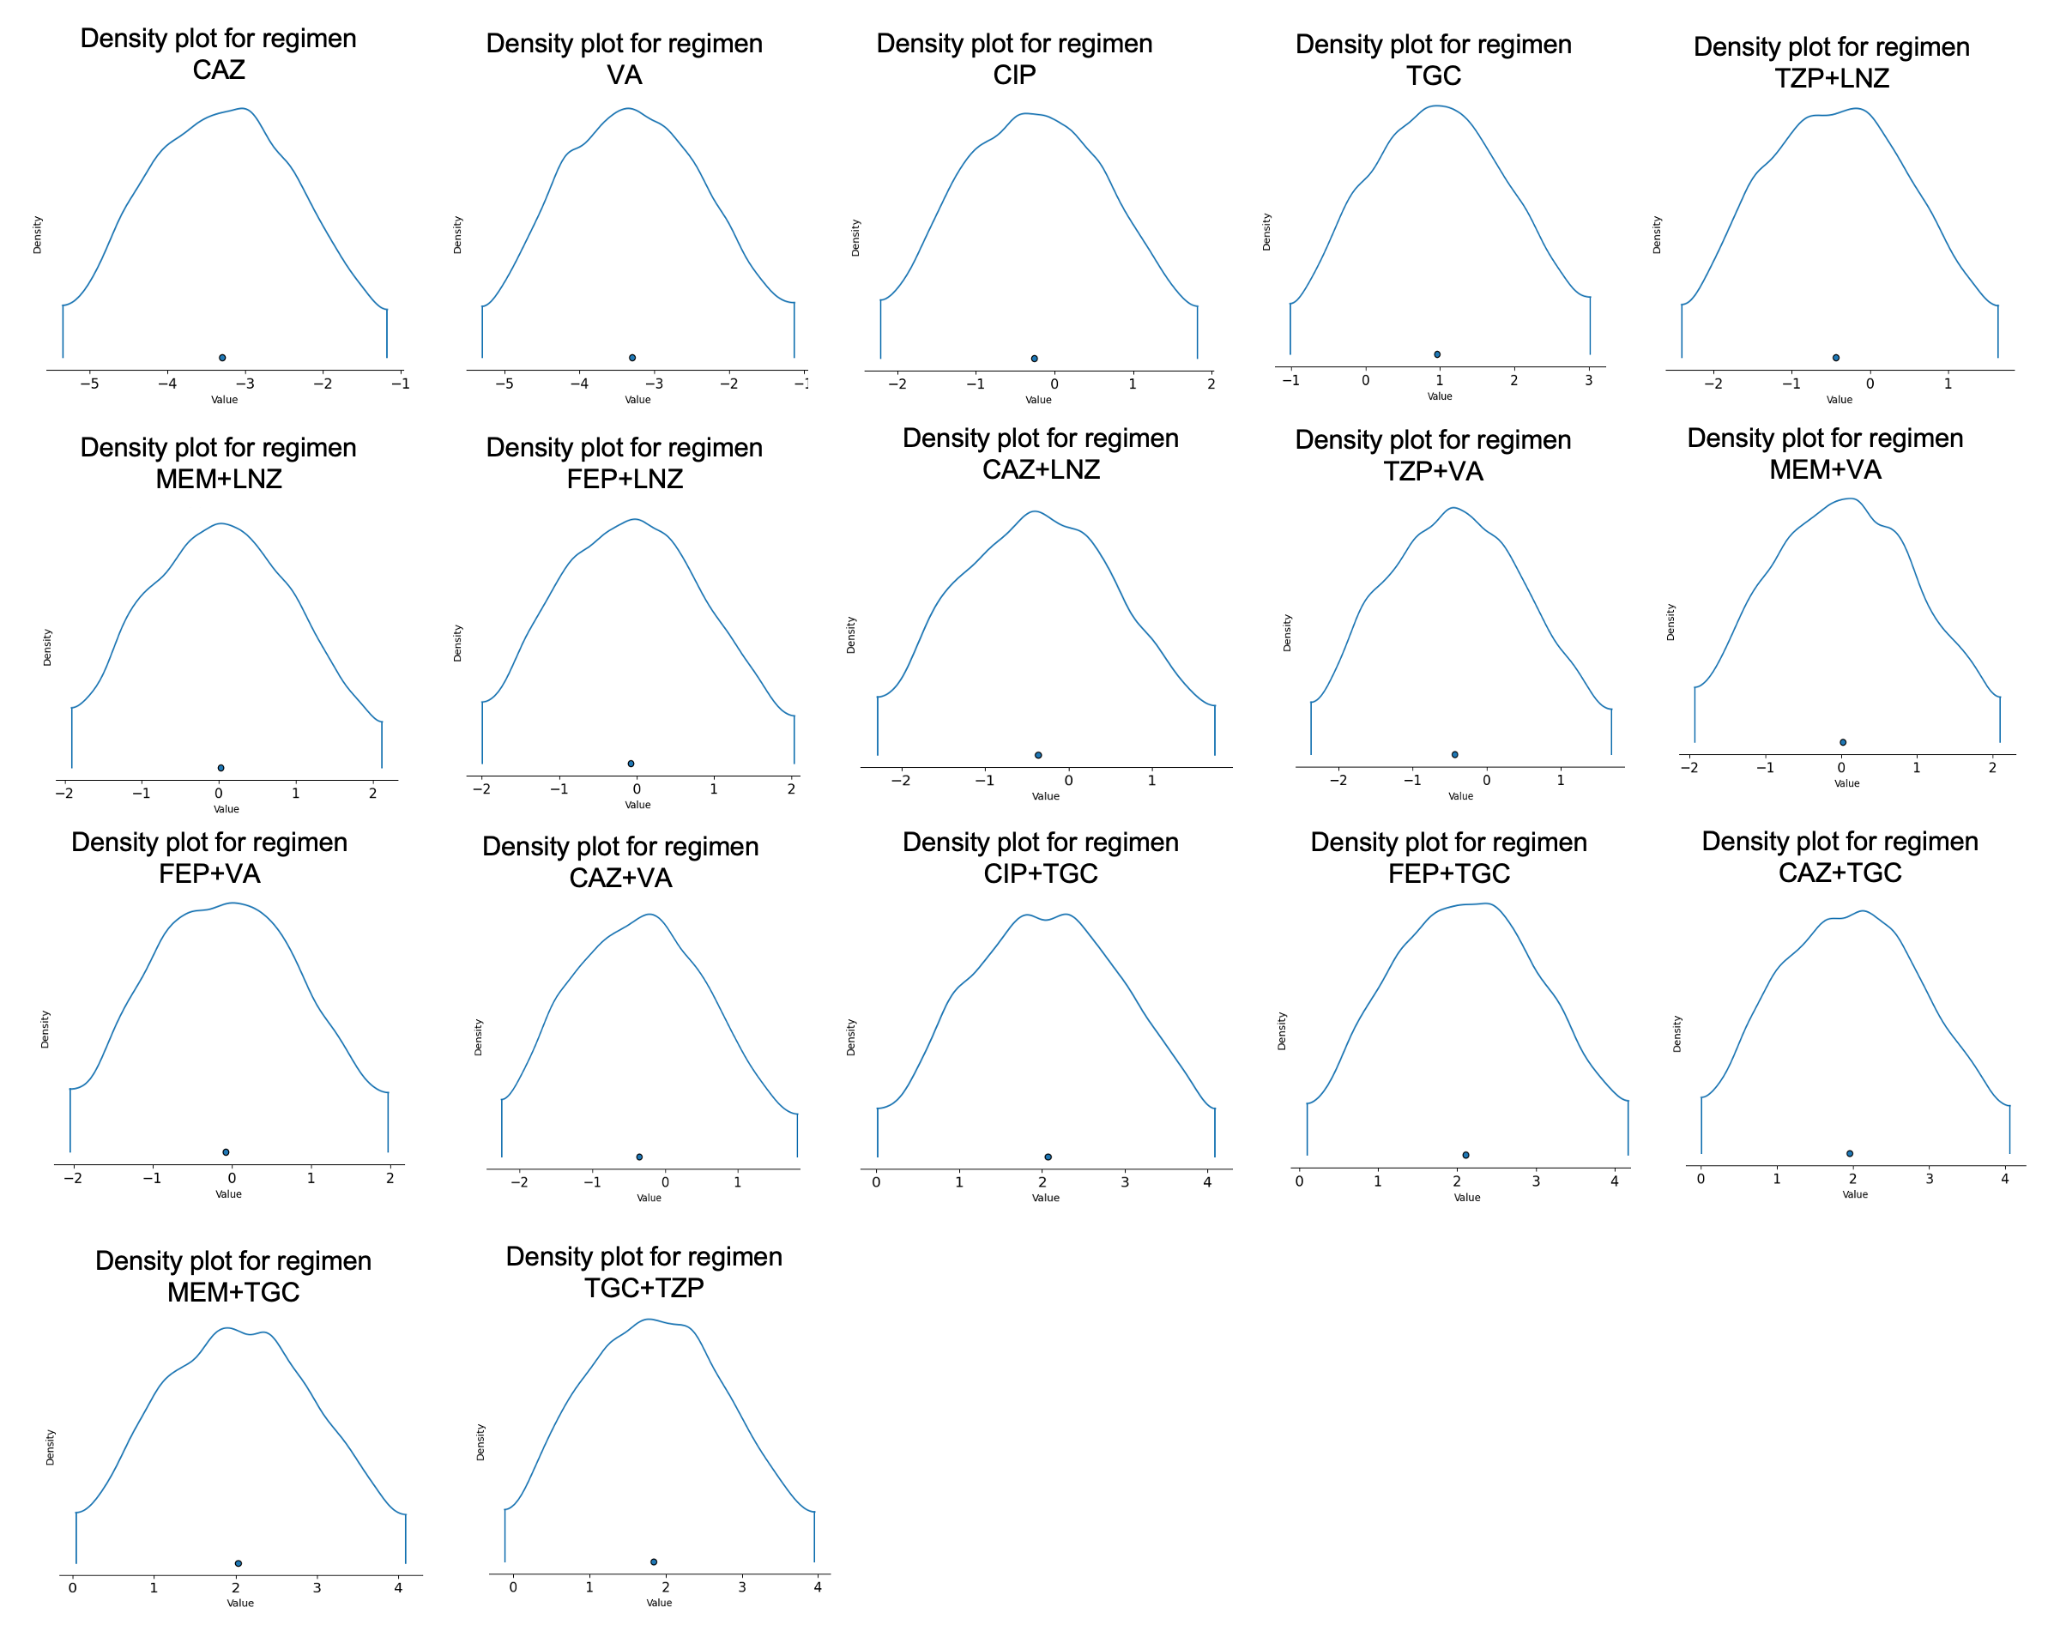
**

Figure S3. Distribution of Isolated Microorganisms Over Time of IMV from Patients Who Developed VAP.

**
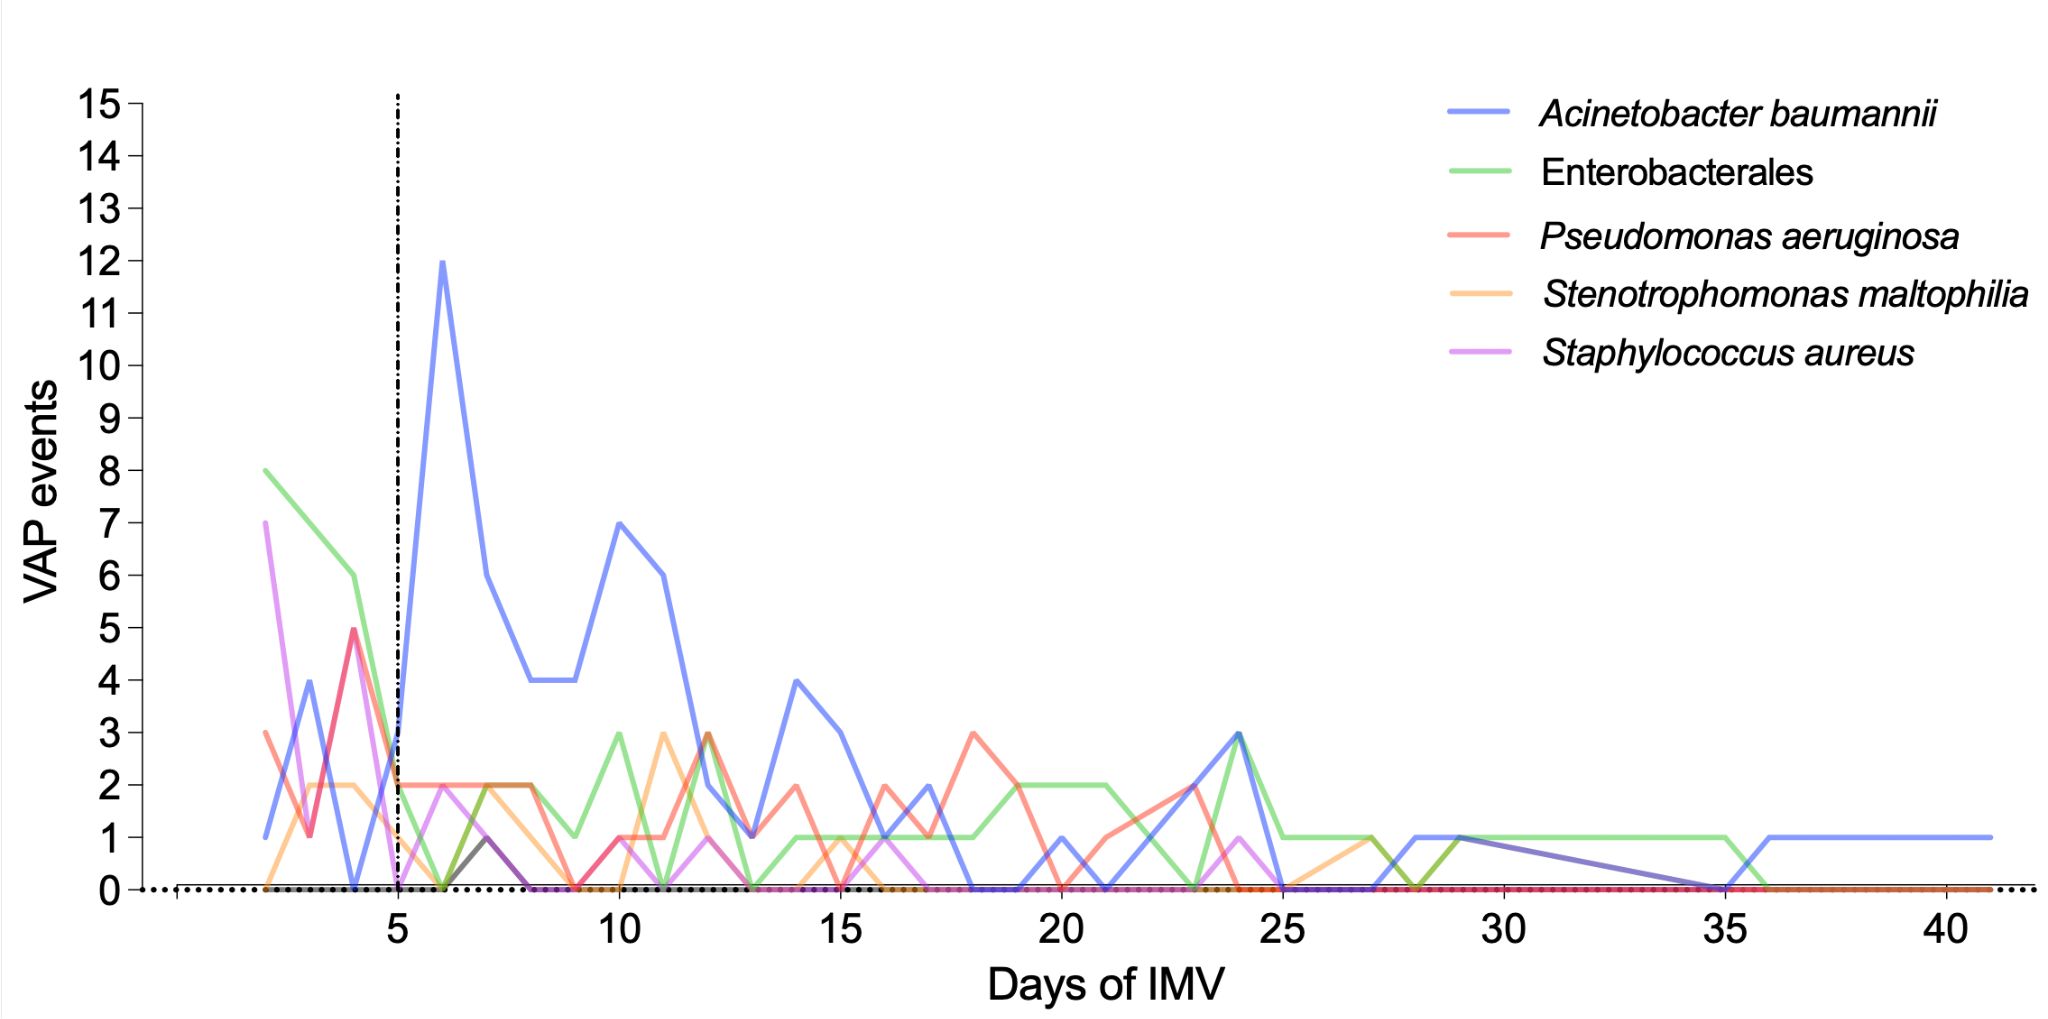
**
